# Supplementary material for: Computational Identification of Guillain-Barre Syndrome Related Genes by an mRNA Gene Expression Profile and a Protein-Protein Interaction Network
Source: Research Square preprint supplement (doi:10.21203/rs.3.rs-461238/v1), 2021-05-07
Supplement: Supplementary file 1 [file 45a88f41756468de877c1088.xlsx]

## Sheet: up-regulated
Category	Term	Count	PValue	%	Genes	List Total	Pop Hits	Pop Total	Fold Enrichment	Bonferroni	Benjamini	FDR
GOTERM_BP_FAT	GO:0010604~positive regulation of macromolecule metabolic process	12	2.92691e-09	60	AKT1, APP, HIF1A, EP300, PSEN1, APOE, UBC, TP53, MDM2, PSMD4, STAT3, CTNNB1	20	857	13528	9.47118	3.32497e-06	3.32497e-06	4.69957e-06
GOTERM_BP_FAT	GO:0051173~positive regulation of nitrogen compound metabolic process	10	7.14427e-08	50	EGFR, AKT1, APP, HIF1A, EP300, APOE, UBC, TP53, STAT3, CTNNB1	20	644	13528	10.5031	8.11556e-05	4.05786e-05	0.000114711
GOTERM_BP_FAT	GO:0031328~positive regulation of cellular biosynthetic process	10	1.21429e-07	50	EGFR, AKT1, APP, HIF1A, EP300, APOE, UBC, TP53, STAT3, CTNNB1	20	685	13528	9.87445	0.000137934	4.598e-05	0.000194971
GOTERM_BP_FAT	GO:0009891~positive regulation of biosynthetic process	10	1.37495e-07	50	EGFR, AKT1, APP, HIF1A, EP300, APOE, UBC, TP53, STAT3, CTNNB1	20	695	13528	9.73237	0.000156182	3.90477e-05	0.000220767
GOTERM_BP_FAT	GO:0042592~homeostatic process	10	2.66656e-07	50	AKT1, APP, HIF1A, EP300, PSEN1, APOE, TP53, SLC9A3R1, STAT3, CTNNB1	20	751	13528	9.00666	0.000302876	6.05825e-05	0.000428153
GOTERM_BP_FAT	GO:0007049~cell cycle	10	3.52412e-07	50	EGFR, AKT1, APP, EP300, GSK3B, UBC, TP53, MDM2, PSMD4, CTNNB1	20	776	13528	8.71649	0.00040026	6.67212e-05	0.000565846
GOTERM_BP_FAT	GO:0007242~intracellular signaling cascade	10	1.94638e-05	50	EGFR, AKT1, PSEN1, GRB2, APOE, GSK3B, TP53, STAT3, SRC, CTNNB1	20	1256	13528	5.38535	0.0218685	0.00315375	0.0312473
GOTERM_BP_FAT	GO:0007166~cell surface receptor linked signal transduction	11	6.52222e-05	55	EGFR, AKT1, APP, PSEN1, GRB2, APOE, GSK3B, SLC9A3R1, STAT3, SRC, CTNNB1	20	1856	13528	4.00884	0.0714164	0.0092191	0.104672
GOTERM_CC_FAT	GO:0043232~intracellular non-membrane-bounded organelle	11	0.00177168	55	AKT1, APP, HIF1A, EP300, PSEN1, UBC, TP53, MDM2, SLC9A3R1, STAT3, CTNNB1	20	2596	12782	2.70805	0.275832	0.275832	2.16446
GOTERM_CC_FAT	GO:0043228~non-membrane-bounded organelle	11	0.00177168	55	AKT1, APP, HIF1A, EP300, PSEN1, UBC, TP53, MDM2, SLC9A3R1, STAT3, CTNNB1	20	2596	12782	2.70805	0.275832	0.275832	2.16446
GOTERM_CC_FAT	GO:0005886~plasma membrane	10	0.0770114	50	EGFR, AKT1, APP, PSEN1, APOE, MDM2, SLC9A3R1, STAT3, SRC, CTNNB1	20	3777	12782	1.69208	1	0.999319	62.8024

## Sheet: down-regulated
Category	Term	Count	PValue	%	Genes	List Total	Pop Hits	Pop Total	Fold Enrichment	Bonferroni	Benjamini	FDR
GOTERM_MF_FAT	GO:0019899~enzyme binding	11	1.32725e-09	47.8261	EGFR, AKT1, HDAC1, SP1, GSK3B, LCK, RAC1, TP53, MDM2, STAT3, CTNNB1	21	523	12983	13.0031	1.65907e-07	1.65907e-07	1.53485e-06
GOTERM_CC_FAT	GO:0005829~cytosol	14	1.44802e-08	60.8696	GRB2, CBL, TP53, SRC, CTNNB1, AKT1, CDC42, HDAC1, GSK3B, LCK, RAC1, UBC, MDM2, LCP2	22	1330	12782	6.11579	2.20098e-06	2.20098e-06	1.73313e-05
GOTERM_BP_FAT	GO:0042981~regulation of apoptosis	11	1.74832e-07	47.8261	EGFR, AKT1, HDAC1, GSK3B, LCK, RAC1, UBC, ESR1, CD2, TP53, SRC	23	804	13528	8.04716	0.000169048	0.000169048	0.000275047
GOTERM_BP_FAT	GO:0043067~regulation of programmed cell death	11	1.91829e-07	47.8261	EGFR, AKT1, HDAC1, GSK3B, LCK, RAC1, UBC, ESR1, CD2, TP53, SRC	23	812	13528	7.96787	0.000185481	9.2745e-05	0.000301787
GOTERM_BP_FAT	GO:0010941~regulation of cell death	11	1.9857e-07	47.8261	EGFR, AKT1, HDAC1, GSK3B, LCK, RAC1, UBC, ESR1, CD2, TP53, SRC	23	815	13528	7.93854	0.000191999	6.40037e-05	0.000312392
GOTERM_BP_FAT	GO:0010604~positive regulation of macromolecule metabolic process	10	3.70129e-06	43.4783	AKT1, EP300, HDAC1, SP1, UBC, ESR1, TP53, MDM2, STAT3, CTNNB1	23	857	13528	6.86317	0.00357275	0.000894387	0.00582275
GOTERM_BP_FAT	GO:0007242~intracellular signaling cascade	11	1.04689e-05	47.8261	EGFR, AKT1, CDC42, GRB2, GSK3B, RAC1, ESR1, TP53, STAT3, SRC, CTNNB1	23	1256	13528	5.1512	0.0100724	0.00202265	0.0164685
GOTERM_MF_FAT	GO:0030528~transcription regulator activity	11	2.72969e-05	47.8261	EP300, HDAC1, SP1, CBL, UBC, ESR1, TP53, MDM2, STAT3, YBX1, CTNNB1	21	1512	12983	4.49776	0.00340634	0.00170463	0.0315619
GOTERM_BP_FAT	GO:0007166~cell surface receptor linked signal transduction	11	0.000308357	47.8261	EGFR, AKT1, GRB2, GSK3B, LCK, CBL, CD2, STAT3, SRC, CTNNB1, LCP2	23	1856	13528	3.48594	0.257868	0.0484895	0.484011
GOTERM_MF_FAT	GO:0003677~DNA binding	10	0.00475898	43.4783	EGFR, EP300, HDAC1, SP1, CBL, ESR1, TP53, STAT3, YBX1, CTNNB1	21	2331	12983	2.65224	0.44915	0.180257	5.36708
GOTERM_BP_FAT	GO:0045449~regulation of transcription	10	0.0156244	43.4783	EP300, HDAC1, SP1, UBC, ESR1, TP53, MDM2, STAT3, YBX1, CTNNB1	23	2601	13528	2.26134	1	0.886442	21.9442
GOTERM_CC_FAT	GO:0043228~non-membrane-bounded organelle	10	0.0158352	43.4783	AKT1, EP300, HDAC1, SP1, LCK, UBC, TP53, MDM2, STAT3, CTNNB1	22	2596	12782	2.23806	0.911629	0.702727	17.3907
GOTERM_CC_FAT	GO:0043232~intracellular non-membrane-bounded organelle	10	0.0158352	43.4783	AKT1, EP300, HDAC1, SP1, LCK, UBC, TP53, MDM2, STAT3, CTNNB1	22	2596	12782	2.23806	0.911629	0.702727	17.3907
GOTERM_CC_FAT	GO:0005886~plasma membrane	12	0.0235016	52.1739	EGFR, AKT1, CDC42, LCK, CBL, RAC1, ESR1, CD2, MDM2, STAT3, SRC, CTNNB1	22	3777	12782	1.84591	0.97308	0.700297	24.7722
