# Supplementary material for: Computational Identification of Guillain-Barre Syndrome Related Genes by an mRNA Gene Expression Profile and a Protein-Protein Interaction Network
Source: Research Square preprint supplement (doi:10.21203/rs.3.rs-461238/v1), 2021-05-07
Supplement: Supplementary file 2 [file 842bb90abcc31cf1c475b696.xlsx]

## Sheet: up-regulated
Category	Term	Count	PValue	%	Genes	List Total	Pop Hits	Pop Total	Fold Enrichment	Bonferroni	Benjamini	FDR
KEGG_PATHWAY	hsa05215:Prostate cancer	8	3.99246e-09	40	EGFR, AKT1, EP300, GRB2, GSK3B, TP53, MDM2, CTNNB1	17	89	5085	26.887	2.47533e-07	2.47533e-07	4.029e-06
KEGG_PATHWAY	hsa05200:Pathways in cancer	10	1.3271e-07	50	EGFR, AKT1, HIF1A, EP300, GRB2, GSK3B, TP53, MDM2, STAT3, CTNNB1	17	328	5085	9.11944	8.22798e-06	4.114e-06	0.000133924
KEGG_PATHWAY	hsa05213:Endometrial cancer	6	3.68721e-07	30	EGFR, AKT1, GRB2, GSK3B, TP53, CTNNB1	17	52	5085	34.5136	2.28605e-05	7.62021e-06	0.000372094
KEGG_PATHWAY	hsa05210:Colorectal cancer	6	4.13219e-06	30	EGFR, AKT1, GRB2, GSK3B, TP53, CTNNB1	17	84	5085	21.3655	0.000256163	6.4047e-05	0.00416992
KEGG_PATHWAY	hsa05214:Glioma	5	3.48383e-05	25	EGFR, AKT1, GRB2, TP53, MDM2	17	63	5085	23.7395	0.00215768	0.000431909	0.0351515
KEGG_PATHWAY	hsa04012:ErbB signaling pathway	5	0.000124374	25	EGFR, AKT1, GRB2, GSK3B, SRC	17	87	5085	17.1907	0.00768204	0.00128446	0.125442
KEGG_PATHWAY	hsa04510:Focal adhesion	6	0.000280807	30	EGFR, AKT1, GRB2, GSK3B, SRC, CTNNB1	17	201	5085	8.92888	0.0172617	0.0024844	0.283015
KEGG_PATHWAY	hsa04722:Neurotrophin signaling pathway	5	0.000488477	25	AKT1, PSEN1, GRB2, GSK3B, TP53	17	124	5085	12.0612	0.0298387	0.00377946	0.491853
KEGG_PATHWAY	hsa04310:Wnt signaling pathway	5	0.00102913	25	EP300, PSEN1, GSK3B, TP53, CTNNB1	17	151	5085	9.90456	0.0618439	0.00706811	1.0337

## Sheet: down-regulated
Category	Term	Count	PValue	%	Genes	List Total	Pop Hits	Pop Total	Fold Enrichment	Bonferroni	Benjamini	FDR
KEGG_PATHWAY	hsa05200:Pathways in cancer	13	1.42761e-10	56.5217	EGFR, GRB2, CBL, TP53, STAT3, CTNNB1, AKT1, CDC42, EP300, HDAC1, GSK3B, RAC1, MDM2	20	328	5085	10.077	9.2795e-09	9.2795e-09	1.45502e-07
KEGG_PATHWAY	hsa05215:Prostate cancer	8	1.68505e-08	34.7826	EGFR, AKT1, EP300, GRB2, GSK3B, TP53, MDM2, CTNNB1	20	89	5085	22.8539	1.09528e-06	5.4764e-07	1.7174e-05
KEGG_PATHWAY	hsa05210:Colorectal cancer	7	3.87818e-07	30.4348	EGFR, AKT1, GRB2, GSK3B, RAC1, TP53, CTNNB1	20	84	5085	21.1875	2.52079e-05	8.4027e-06	0.000395263
KEGG_PATHWAY	hsa05213:Endometrial cancer	6	9.59054e-07	26.087	EGFR, AKT1, GRB2, GSK3B, TP53, CTNNB1	20	52	5085	29.3365	6.23366e-05	1.55845e-05	0.000977461
KEGG_PATHWAY	hsa04660:T cell receptor signaling pathway	7	1.73092e-06	30.4348	AKT1, CDC42, GRB2, GSK3B, LCK, CBL, LCP2	20	108	5085	16.4792	0.000112503	2.25017e-05	0.00176413
KEGG_PATHWAY	hsa04510:Focal adhesion	8	4.56854e-06	34.7826	EGFR, AKT1, CDC42, GRB2, GSK3B, RAC1, SRC, CTNNB1	20	201	5085	10.1194	0.000296912	4.94914e-05	0.00465615
KEGG_PATHWAY	hsa05212:Pancreatic cancer	6	4.92973e-06	26.087	EGFR, AKT1, CDC42, RAC1, TP53, STAT3	20	72	5085	21.1875	0.000320382	4.57751e-05	0.00502425
KEGG_PATHWAY	hsa05220:Chronic myeloid leukemia	6	6.03902e-06	26.087	AKT1, HDAC1, GRB2, CBL, TP53, MDM2	20	75	5085	20.34	0.000392461	4.9066e-05	0.00615478
KEGG_PATHWAY	hsa04520:Adherens junction	6	6.88127e-06	26.087	EGFR, CDC42, EP300, RAC1, SRC, CTNNB1	20	77	5085	19.8117	0.000447184	4.9697e-05	0.00701315
KEGG_PATHWAY	hsa04012:ErbB signaling pathway	6	1.25742e-05	26.087	EGFR, AKT1, GRB2, GSK3B, CBL, SRC	20	87	5085	17.5345	0.000816992	8.17293e-05	0.0128148
KEGG_PATHWAY	hsa04722:Neurotrophin signaling pathway	6	7.03101e-05	26.087	AKT1, CDC42, GRB2, GSK3B, RAC1, TP53	20	124	5085	12.3024	0.00455989	0.000415397	0.0716368
KEGG_PATHWAY	hsa05214:Glioma	5	7.21517e-05	21.7391	EGFR, AKT1, GRB2, TP53, MDM2	20	63	5085	20.1786	0.00467905	0.000390759	0.0735124
KEGG_PATHWAY	hsa05211:Renal cell carcinoma	5	0.000109231	21.7391	AKT1, CDC42, EP300, GRB2, RAC1	20	70	5085	18.1607	0.00707528	0.000546038	0.111272
KEGG_PATHWAY	hsa04062:Chemokine signaling pathway	6	0.000486748	26.087	AKT1, CDC42, GRB2, GSK3B, RAC1, STAT3	20	187	5085	8.15775	0.0311508	0.0022579	0.494984
KEGG_PATHWAY	hsa04110:Cell cycle	5	0.001013	21.7391	EP300, HDAC1, GSK3B, TP53, MDM2	20	125	5085	10.17	0.0637554	0.00438227	1.02766
KEGG_PATHWAY	hsa04310:Wnt signaling pathway	5	0.00204464	21.7391	EP300, GSK3B, RAC1, TP53, CTNNB1	20	151	5085	8.41887	0.124568	0.00828039	2.06442
KEGG_PATHWAY	hsa04630:Jak-STAT signaling pathway	5	0.00225084	21.7391	AKT1, EP300, GRB2, CBL, STAT3	20	155	5085	8.20161	0.136248	0.00857885	2.27047
KEGG_PATHWAY	hsa04010:MAPK signaling pathway	6	0.00243262	26.087	EGFR, AKT1, CDC42, GRB2, RAC1, TP53	20	267	5085	5.71348	0.146417	0.0087566	2.45178
KEGG_PATHWAY	hsa04144:Endocytosis	5	0.00419672	21.7391	EGFR, CDC42, CBL, MDM2, SRC	20	184	5085	6.90897	0.239182	0.0142844	4.19572
