# Supplementary material for: Computational Identification of Guillain-Barre Syndrome Related Genes by an mRNA Gene Expression Profile and a Protein-Protein Interaction Network
Source: Research Square preprint supplement (doi:10.21203/rs.3.rs-461238/v1), 2021-05-07
Supplement: Supplementary file 3 [file e719e126703d986d19e235a5.xlsx]

## Sheet: MaxRel_Table
MaxRel Table
Order	FeatureIndex	FeatureName	RelScore														order	index	aa	REGU_AVG
1	11063	SLC35C1	1														1	11063	SLC35C1	-1
2	11065	SLC35D1	1														2	6673	LOC100507448	1
3	942	ATXN1	1														3	11065	SLC35D1	-1
4	11057	SLC35A4	1														4	11073	SLC35F2	1
5	11056	SLC35A3	1														5	11049	SLC31A1	-1
6	11047	SLC30A7	1														6	3678	ELFN1	1
7	11073	SLC35F2	1														7	3676	ELF2	-1
8	11074	SLC35F5	1														8	3685	ELMO1	-1
9	3638	EIF2C4	1														9	3682	ELL	0
10	11099	SLC39A8	1														10	3476	DTX3L	-1
11	11049	SLC31A1	1														11	955	AUP1	1
12	3678	ELFN1	1														12	11158	SLC9A6	-1
13	3676	ELF2	1														13	3686	ELMO2	0
14	3685	ELMO1	1														14	899	ATP5O	1
15	3682	ELL	1														15	3825	ESCO1	-1
16	3582	EFCAB2	1														16	3835	ESYT2	-1
17	3653	EIF3M	1														17	10909	SLA2	1
18	3672	ELAC1	1														18	3863	EXOC3L1	1
19	3662	EIF4EBP2	1														19	10851	SHOC2	-1
20	3607	EGR2	1														20	10845	SHISA5	-1
21	929	ATP8B3	1														21	3856	EWSR1	-0.333333
22	11211	SMCHD1	1														22	10906	SKP1	-1
23	13879	XLOC_l2_009639	1														23	11006	SLC25A39	1
24	3497	DUSP28	1														24	917	ATP6V1E1	-1
25	11209	SMC5	1														25	925	ATP8A1	-1
26	11194	SMARCA5	1														26	3751	EPB41	0
27	13889	XLOC_l2_010239	1														27	3472	DTNBP1	1
28	3476	DTX3L	1														28	11528	SSBP4	1
29	11217	SMEK2	1														29	11534	SSNA1	-1
30	968	AXIN2	1														30	3193	DEFB1	1
31	11013	SLC25A46	1														31	3153	DDX19B	1
32	13884	XLOC_l2_010014	1														32	3150	DDX17	0
33	3571	EEA1	1														33	11478	SREBF1	0
34	11154	SLC9A3R1	1														34	11490	SRP14	-1
35	955	AUP1	1														35	3049	CYTH4	0
36	11112	SLC45A4	1														36	11607	STK24	0
37	11111	SLC45A3	1														37	11461	SPTAN1	0
38	3548	EBPL	1														38	11589	STAT4	-1
39	3551	ECE2	1														39	3130	DCXR	-1
40	11158	SLC9A6	1														40	3142	DDOST	1
41	3686	ELMO2	1														41	11311	SNURF	-1
42	3468	DTD1	1														42	989	B4GALT3	0
43	3813	ERO1L	1														43	11302	SNRPD2	-1
44	3803	ERI1	1														44	11300	SNRPC	0
45	10887	SIRPB2	1														45	11435	SPOCK2	-1
46	899	ATP5O	1														46	3276	DHX8	-1
47	3825	ESCO1	1														47	11390	SPATA21	0
48	3835	ESYT2	1														48	11358	SOX13	1
49	3793	ERCC4	1														49	4439	FRYL	-1
50	3785	ERAP1	1														50	14126	ZC3HAV1	-1
51	3820	ERVFRD-1	1														51	749	ARNTL	0
52	10909	SLA2	1														52	14109	ZBTB6	-1
53	3833	ESRRA	1														53	10370	RPS14	0.333333
54	3863	EXOC3L1	1														54	10427	RRP1	1
55	10851	SHOC2	1														55	4369	FMN1	1
56	13995	XLOC_l2_015532	1														56	10323	RPL27	1
57	10845	SHISA5	1														57	10356	RPN1	1
58	3770	EPHX2	1														58	754	ARPC4	-1
59	892	ATP5G3	1														59	10367	RPS11	1
60	3856	EWSR1	1														60	4386	FNDC9	-1
61	3854	EVL	1														61	14161	ZDHHC4	-1
62	10906	SKP1	1														62	14155	ZDHHC20	1
63	3466	DSTN	1														63	10196	RNF113B	1
64	11006	SLC25A39	1														64	10180	RNASE3	1
65	3697	ELP3	1														65	10156	RIN3	-1
66	10993	SLC25A25	1														66	4612	GDPD5	0
67	3701	EME1	1														67	3017	CYP11A1	1
68	917	ATP6V1E1	1														68	4009	FAM178B	1
69	10951	SLC19A2	1														69	4025	FAM190B	-1
70	925	ATP8A1	1														70	14019	XRCC6	1
71	11008	SLC25A40	1														71	10701	SEPW1	-1
72	13949	XLOC_l2_013633	1														72	3985	FAM160B1	-1
73	3694	ELOVL6	1														73	3939	FAM115C	-0.333333
74	3731	ENOPH1	1														74	10696	SEPHS1	-1
75	910	ATP6V0E1	1														75	10828	SH3KBP1	-0.333333
76	911	ATP6V0E2	1														76	4249	FER	-1
77	10937	SLC16A10	1														77	10488	RYK	1
78	3751	EPB41	1														78	10510	SACM1L	-1
79	3760	EPC2	1														79	4207	FBXO7	-1
80	3737	ENPP5	1														80	14086	ZBTB2	-1
81	3747	ENY2	1														81	10467	RUFY2	-1
82	3744	ENTPD6	1														82	4275	FGFRL1	-1
83	3472	DTNBP1	1														83	799	ASL	1
84	3867	EXOC6B	1														84	10599	SCNN1D	0.333333
85	11528	SSBP4	1														85	4065	FAM40A	0
86	11534	SSNA1	1														86	10632	SDHD	-0.333333
87	3193	DEFB1	1														87	4193	FBXO31	-1
88	3183	DDX60	1														88	4712	GMEB1	-1
89	11511	SRSF12	1														89	2008	CCDC12	1
90	3203	DEK	1														90	2038	CCDC23	0
91	11548	SSX7	1														91	12596	TSEN54	-1
92	3153	DDX19B	1														92	12612	TSPAN14	0
93	11520	SRXN1	1														93	12601	TSHZ1	-1
94	3150	DDX17	1														94	1953	CASP5	-1
95	11503	SRRM1	1														95	12698	TUBA1B	-1
96	11478	SREBF1	1														96	1948	CASP10	-0.333333
97	11482	SRF	1														97	1926	CARD10	1
98	11473	SRBD1	1														98	1923	CAPZA1	0
99	1029	BAZ1A	1														99	1313	C12orf57	-1
100	3147	DDX1	1														100	2192	CD3E	-1
101	11490	SRP14	1														101	2201	CD48	1
102	3219	DERL2	1														102	2169	CD244	-1
103	11488	SRI	1														103	12537	TRIM56	1
104	3152	DDX19A	1														104	2124	CCNK	0
105	3240	DGKZ	1														105	1863	CACNA2D4	-1
106	3049	CYTH4	1														106	1607	C22orf46	1
107	3040	CYP4F8	1														107	13021	VCPIP1	-1
108	11607	STK24	1														108	13000	VAMP5	1
109	11613	STK38	1														109	1595	C21orf91	-1
110	3107	DCK	1														110	13026	VDR	-1
111	11581	STARD3NL	1														111	12997	VAMP2	-1
112	1074	BCL9L	1														112	1652	C3orf36	-1
113	1077	BCOR	1														113	12961	USP4	-1
114	11593	STAU1	1														114	12966	USP47	-1
115	11461	SPTAN1	1														115	12985	UTP18	1
116	11589	STAT4	1														116	13104	VWCE	1
117	3130	DCXR	1														117	13049	VPRBP	0
118	1056	BCL10	1														118	1570	C20orf201	-1
119	3142	DDOST	1														119	1471	C19orf66	1
120	3141	DDIT4	1														120	12960	USP39	0
121	13769	XLOC_l2_001889	1														121	12798	UBE2F	1
122	11577	STAMBPL1	1														122	1812	C9orf173	1
123	11572	STAG2	1														123	12836	UBP1	-1
124	1058	BCL11B	1														124	12797	UBE2E4P	-1
125	11468	SPTY2D1	1														125	1704	C5orf56	-1
126	10842	SHFM1	1														126	1427	C17orf85	-1
127	11311	SNURF	1														127	1436	C18orf25	-1
128	11317	SNX13	1														128	1722	C6orf136	-1
129	13850	XLOC_l2_008008	1														129	11899	TCEB1	-1
130	11303	SNRPD3	1														130	2743	COX17	1
131	11301	SNRPD1	1														131	11857	TBC1D7	1
132	989	B4GALT3	1														132	11861	TBCA	-1
133	11330	SNX27	1														133	2626	CNGB1	1
134	3356	DNAJC1	1														134	12034	THRAP3	-1
135	11302	SNRPD2	1														135	2735	CORO7	1
136	11341	SOCS2	1														136	2598	CLPS	1
137	3400	DOCK4	1														137	2964	CWF19L1	1
138	11268	SNORA16B	1														138	2943	CTU2	-1
139	13867	XLOC_l2_009182	1														139	2974	CXCL5	-1
140	3433	DPP4	1														140	11693	SUSD1	-1
141	13869	XLOC_l2_009285	1														141	13656	XLOC_012444	0
142	3341	DNAJA2	1														142	2899	CTAGE15P	-1
143	11300	SNRPC	1														143	11799	TAP1	-1
144	11282	SNORA77	1														144	1107	BIN1	-1
145	3406	DOK1	1														145	11759	TACO1	1
146	11340	SOCS1	1														146	1180	BROX	1
147	3457	DROSHA	1														147	13476	XLOC_006443	-1
148	11422	SPICE1	1														148	2382	CEP350	-1
149	11435	SPOCK2	1														149	12405	TOR1AIP1	-1
150	3283	DIEXF	1														150	12425	TP73	-1
151	3276	DHX8	1														151	2295	CDK5RAP2	0
152	3288	DIP2B	1														152	12383	TOE1	1
153	11402	SPDYE1	1														153	2532	CLASP1	0
154	11438	SPOP	1														154	2578	CLIC5	0
155	3259	DHRS9	1														155	1188	BRWD3	1
156	3284	DIMT1	1														156	12131	TMEM104	0
157	3251	DHRS13	1														157	12102	TM9SF2	1
158	1015	BAIAP3	1														158	12080	TLE4	-0.666667
159	11359	SOX4	1														159	2431	CHCHD3	1
160	11390	SPATA21	1														160	2467	CHMP4A	-1
161	11357	SOS2	1														161	2507	CIAPIN1	-1
162	11358	SOX13	1														162	2482	CHRM4	-1
163	11354	SORL1	1														163	674	ARHGAP30	-1
164	11393	SPATA5L1	1														164	6173	L2HGDH	0.333333
165	1010	BAHD1	1														165	8467	OR2A12	-1
166	13824	XLOC_l2_006737	1														166	8609	P4HA2	1
167	884	ATP5A1	1														167	14522	ZNF622	1
168	11661	SUCLG1	1														168	6076	KLRB1	-1
169	4429	FRA10AC1	1														169	6133	KRTAP10-3	1
170	4428	FPR3	1														170	8611	P4HB	1
171	7333	MEF2A	1														171	8660	PAPD7	1
172	4439	FRYL	1														172	8298	NSMCE1	-1
173	14126	ZC3HAV1	1														173	6366	LOC100127946	1
174	4463	FUNDC1	1														174	6442	LOC100130342	-1
175	10300	RPIA	1														175	6458	LOC100130542	1
176	749	ARNTL	1														176	8266	NR3C1	-1
177	741	ARMC7	1														177	203	ADAM12	0
178	4420	FOXP3	1														178	239	ADD1	1
179	10272	RNU4ATAC	1														179	8405	OBSCN	0
180	4484	FYB	1														180	8424	OGDH	1
181	10241	RNF220	1														181	6338	LLPH	-1
182	4494	G3BP1	1														182	223	ADAR	-1
183	4486	FYN	1														183	8685	PARP3	1
184	4414	FOXN2	1														184	8922	PHC3	-1
185	10259	RNF7	1														185	8912	PGRMC2	-1
186	10251	RNF38	1														186	8877	PFDN5	1
187	4469	FUT11	1														187	8964	PI4K2B	-1
188	10311	RPL17	1														188	5795	KANSL2	0
189	4506	GABPA	1														189	5995	KIF2A	1
190	10389	RPS27L	1														190	5990	KIF22	-1
191	4342	FLJ42351	1														191	5937	KIAA0947	-1
192	14103	ZBTB44	1														192	5965	KIAA1715	-1
193	10372	RPS15A	1														193	5946	KIAA1267	-1
194	14109	ZBTB6	1														194	65	ABCD3	0
195	10370	RPS14	1														195	7101	MADD	0
196	10427	RRP1	1														196	7577	MPZL2	-1
197	4313	FLI1	1														197	7162	MAP2K7	-1
198	4368	FLYWCH2	1														198	7579	MR1	0
199	726	ARL4C	1														199	6961	LRP8	1
200	4369	FMN1	1														200	6932	LPGAT1	-1
201	10323	RPL27	1														201	7171	MAP3K4	-1
202	10356	RPN1	1														202	7023	LSM14A	0
203	754	ARPC4	1														203	7456	MIS12	-1
204	10316	RPL22	1														204	20	9-Sep	0
205	14118	ZC3H14	1														205	7291	MDH2	-1
206	10367	RPS11	1														206	7293	MDM1	0
207	4386	FNDC9	1														207	7371	METTL23	0
208	4381	FNBP1	1														208	7311	MED15	1
209	10228	RNF187	1														209	7349	MESDC1	-1
210	10443	RSL1D1	1														210	6916	LOC731932	1
211	4637	GGT1	1														211	7200	MAPKAP1	-0.333333
212	693	ARHGEF19	1														212	43	ABCA2	0
213	14161	ZDHHC4	1														213	7206	MAPRE2	-1
214	10089	RG9MTD1	1														214	7174	MAP3K7	-1
215	4651	GIMAP4	1														215	30	AAGAB	-1
216	4653	GIMAP6	1														216	6622	LOC100506191	-1
217	14155	ZDHHC20	1														217	6615	LOC100506047	0
218	14154	ZDHHC2	1														218	6647	LOC100506906	-1
219	4649	GIMAP1	1														219	8055	NEK9	-1
220	14153	ZDHHC18	1														220	8107	NGDN	-1
221	4652	GIMAP5	1														221	8131	NIPA2	-1
222	4671	GK5	1														222	185	ACTR3	-1
223	10076	RFFL	1														223	8069	NEUROG1	1
224	4695	GLT25D2	1														224	14585	ZNF728	-1
225	10062	REST	1														225	7955	NCK1	-1
226	699	ARHGEF40	1														226	6822	LOC401480	1
227	4654	GIMAP7	1														227	6854	LOC644285	1
228	4665	GJA1	1														228	6812	LOC400128	1
229	14168	ZER1	1														229	7799	MYBBP1A	1
230	10104	RGS12	1														230	7787	MVP	-1
231	10445	RSPH3	1														231	7681	MSH6	-1
232	4547	GAPVD1	1														232	7690	MSRA	-1
233	10196	RNF113B	1														233	6877	LOC648044	-1
234	10180	RNASE3	1														234	7810	MYEOV2	0
235	10184	RNASEH1	1														235	7925	NBAS	-1
236	4578	GBP5	1														236	7905	NAP1L4	0
237	710	ARID4B	1														237	144	ACOX2	1
238	14139	ZCCHC4	1														238	6750	LOC200726	1
239	4510	GABRB3	1														239	7861	N4BP2	-1
240	10163	RIPK1	1														240	5127	HERC6	-1
241	10218	RNF166	1														241	5129	HERPUD2	-1
242	10156	RIN3	1														242	5170	HIPK2	-0.2
243	10127	RHOB	1														243	5112	HEG1	-1
244	10138	RHOU	1														244	5165	HINT2	1
245	4621	GFI1	1														245	9605	PSME1	-1
246	4612	GDPD5	1														246	5059	HBS1L	-0.5
247	10109	RGS2	1														247	9593	PSMD11	-1
248	10152	RIMKLB	1														248	5073	HCST	-1
249	4598	GCOM1	1														249	9716	PVRL1	-1
250	707	ARID3B	1														250	5103	HEATR7B1	1
251	14094	ZBTB33	1														251	561	AP2A1	1
252	3017	CYP11A1	1														252	9775	Q9EPR2	1
253	14021	XRN1	1														253	9599	PSMD4	1
254	852	ATG9B	1														254	9455	PRKCB	-1
255	10724	SERPINB9	1														255	5263	HLA-F	1
256	4009	FAM178B	1														256	5301	HNRNPA1L2	0.6
257	4025	FAM190B	1														257	5307	HNRNPD	0
258	10710	SERINC1	1														258	588	APH1A	1
259	4002	FAM173B	1														259	9573	PSMB1	0
260	10739	SETBP1	1														260	5206	HIST1H3C	-1
261	10714	SERINC5	1														261	9531	PRR5	-1
262	14019	XRCC6	1														262	9586	PSMC3	-1
263	845	ATG4A	1														263	9589	PSMC5	1
264	10699	SEPP1	1														264	9511	PRPF6	-1
265	10700	SEPSECS	1														265	5239	HK1	1
266	4043	FAM206A	1														266	14287	ZNF207	1
267	837	ATG12	1														267	647	ARFGAP2	-1
268	3955	FAM125B	1														268	9952	RB1CC1	-1
269	10708	SERGEF	1														269	4832	GPR108	1
270	10701	SEPW1	1														270	4828	GPN1	-1
271	14025	XYLT1	1														271	9965	RBL2	-1
272	3985	FAM160B1	1														272	4784	GOLPH3	-1
273	10685	SEMA4F	1														273	4722	GMPS	-1
274	3894	F2RL2	1														274	4750	GNGT2	-1
275	3887	EZH2	1														275	9927	RASA3	-1
276	3913	FAIM	1														276	4956	GSTP1	1
277	10803	SGTB	1														277	4943	GSPT2	-1
278	3917	FAM100B	1														278	9797	RAB11B	-1
279	14010	XPO6	1														279	14234	ZMYND11	-1
280	10822	SH3D19	1														280	9905	RANGRF	-1
281	3882	EXT2	1														281	9849	RAB8A	-1
282	14007	XPO1	1														282	9865	RAC1	-1
283	4058	FAM26F	1														283	5593	ILDR1	1
284	3918	FAM101B	1														284	9281	PPA1	-1
285	3939	FAM115C	1														285	9239	POLR2L	1
286	3936	FAM114A1	1														286	9150	PLXNA4	-0.333333
287	10776	SFT2D2	1														287	5464	IDS	-1
288	3946	FAM120A	1														288	14373	ZNF350	-1
289	861	ATOX1	1														289	9105	PLEKHA2	-1
290	3919	FAM102A	1														290	5544	IL10RA	1
291	3926	FAM107B	1														291	5539	IKBKG	1
292	3922	FAM104A	1														292	445	AMPD2	-1
293	10696	SEPHS1	1														293	444	AMOTL1	-1
294	10828	SH3KBP1	1														294	5547	IL12RB1	-1
295	4243	FDXACB1	1														295	455	ANAPC13	-1
296	10509	SAC3D1	1														296	5697	ISG20L2	1
297	4249	FER	1														297	9347	PPP1R2	-0.333333
298	10507	S1PR5	1														298	9334	PPP1R11	-1
299	10493	S100A12	1														299	5709	ITCH	-1
300	10488	RYK	1														300	14309	ZNF24	0
301	10510	SACM1L	1														301	9360	PPP2R1A	1
302	4226	FCGR3A	1														302	5391	HSP90AA2	-1
303	14072	ZAP70	1														303	5377	HSD17B10	-1
304	4207	FBXO7	1														304	14320	ZNF26	-1
305	4260	FGD3	1														305	435	AMH	1
306	10472	RUNX2	1														306	5694	ISCU	-1
307	14086	ZBTB2	1														307	9305	PPIB	1
308	10467	RUFY2	1														308	9159	PMF1	1
309	10471	RUNX1	1														309	9372	PPP2R5D	-1
310	803	ASNSD1	1														310	1543	C1QL2	1
311	4264	FGF18	1														311	11211	SMCHD1	-1
312	4275	FGFRL1	1														312	4494	G3BP1	-1
313	4272	FGFR1OP2	1														313	11702	SUZ12	-1
314	799	ASL	1														314	11057	SLC35A4	-1
315	10465	RTP4	1														315	11074	SLC35F5	0
316	10652	SEC24A	1														316	3662	EIF4EBP2	-1
317	10664	SECISBP2	1														317	3152	DDX19A	-1
318	10647	SEC22B	1														318	11209	SMC5	-1
319	826	ATF1	1														319	14010	XPO6	-1
320	10622	SDCCAG8	1														320	2645	CNPPD1	-1
321	10599	SCNN1D	1														321	5723	ITGAV	-1
322	4065	FAM40A	1														322	9655	PTMA	1
323	10674	SELPLG	1														323	11047	SLC30A7	-1
324	10632	SDHD	1														324	3653	EIF3M	-1
325	10683	SEMA4C	1														325	911	ATP6V0E2	-1
326	10615	SDAD1	1														326	1015	BAIAP3	1
327	4193	FBXO31	1														327	11359	SOX4	1
328	10548	SATB1	1														328	3926	FAM107B	-1
329	10544	SASH3	1														329	12362	TNNC1	-1
330	14054	YRDC	1														330	8073	NF2	-1
331	14057	YTHDF2	1														331	929	ATP8B3	-1
332	4162	FBLN5	1														332	11194	SMARCA5	-1
333	10554	SBK1	1														333	3760	EPC2	-1
334	10560	SCAF11	1														334	4578	GBP5	-1
335	3030	CYP2R1	1														335	10272	RNU4ATAC	1
336	4712	GMEB1	1														336	13079	VPS8	-1
337	1081	BDH1	1														337	5738	ITK	-1
338	12658	TTC27	1														338	7891	NAE1	-1
339	12661	TTC30B	1														339	7801	MYBL2	1
340	1991	CCAR1	1														340	3497	DUSP28	-1
341	12640	TSTD1	1														341	3813	ERO1L	-1
342	12622	TSPAN5	1														342	3203	DEK	-1
343	2008	CCDC12	1														343	710	ARID4B	-1
344	1960	CAST	1														344	10138	RHOU	-1
345	1954	CASP6	1														345	12028	THOC5	-1
346	1992	CCBL1	1														346	14592	ZNF74	-1
347	1950	CASP2	1														347	5624	INPP4A	-1
348	12619	TSPAN32	1														348	13884	XLOC_l2_010014	1
349	2038	CCDC23	1														349	892	ATP5G3	-1
350	12596	TSEN54	1														350	7333	MEF2A	1
351	12587	TSC1	1														351	837	ATG12	-1
352	2039	CCDC25	1														352	7808	MYD88	1
353	1366	C15orf61	1														353	4621	GFI1	-1
354	12612	TSPAN14	1														354	1234	C10orf118	-1
355	12601	TSHZ1	1														355	9462	PRKCQ	-1
356	12608	TSPAN1	1														356	11154	SLC9A3R1	-1
357	1953	CASP5	1														357	10951	SLC19A2	-1
358	2053	CCDC53	1														358	13231	XAF1	-1
359	12734	TXK	1														359	14139	ZCCHC4	-1
360	1881	CALM2	1														360	5743	ITPK1	-1
361	1895	CAMK2N1	1														361	10822	SH3D19	1
362	13248	XLOC_000268	1														362	5582	IL32	-1
363	12722	TULP2	1														363	1545	C1QTNF1	1
364	1920	CAPRIN1	1														364	3548	EBPL	0.333333
365	1880	CALM1	1														365	11912	TCF7	-1
366	12745	TXNDC3	1														366	3747	ENY2	-1
367	1900	CAMP	1														367	5755	IVNS1ABP	-1
368	2068	CCDC72	1														368	707	ARID3B	-1
369	12698	TUBA1B	1														369	4264	FGF18	-1
370	12671	TTC39B	1														370	11056	SLC35A3	-1
371	1930	CARD17	1														371	11217	SMEK2	-1
372	12669	TTC38	1														372	11708	SVIP	-1
373	13271	XLOC_000659	1														373	3551	ECE2	-1
374	1948	CASP10	1														374	11581	STARD3NL	-1
375	12684	TTLL1	1														375	14021	XRN1	-1
376	1926	CARD10	1														376	1746	C6orf81	1
377	1923	CAPZA1	1														377	968	AXIN2	-1
378	2043	CCDC34	1														378	2328	CEACAM1	0
379	1861	CACNA2D2	1														379	7671	MS4A2	-1
380	2178	CD300A	1														380	7213	MARK4	1
381	2176	CD2AP	1														381	3468	DTD1	-1
382	2179	CD300C	1														382	11593	STAU1	-1
383	1303	C12orf4	1														383	10739	SETBP1	1
384	1299	C12orf33	1														384	3251	DHRS13	-1
385	2191	CD3D	1														385	9460	PRKCH	-1
386	2174	CD276	1														386	9222	POLR1A	-1
387	2173	CD274	1														387	13696	XLOC_013853	1
388	12476	TRANK1	1														388	3803	ERI1	-1
389	13347	XLOC_002344	1														389	11572	STAG2	-0.5
390	1297	C12orf26	1														390	3919	FAM102A	-1
391	12445	TPRG1L	1														391	4243	FDXACB1	-1
392	12447	TPRN	1														392	12414	TP53AIP1	1
393	13382	XLOC_003510	1														393	7216	MARVELD1	1
394	13380	XLOC_003405	1														394	12354	TNIK	-1
395	1313	C12orf57	1														395	7811	MYH10	-1
396	2192	CD3E	1														396	3793	ERCC4	-1
397	2201	CD48	1														397	11468	SPTY2D1	-1
398	1294	C12orf11	1														398	1303	C12orf4	-1
399	2169	CD244	1														399	8689	PARP9	-1
400	12775	UBA6	1														400	6400	LOC100129112	-1
401	12554	TRIP4	1														401	14199	ZFYVE20	-1
402	2082	CCDC88C	1														402	3820	ERVFRD-1	-1
403	2087	CCDC91	1														403	8393	OAS1	-1
404	13327	XLOC_001932	1														404	7202	MAPKAPK3	1
405	2099	CCL20	1														405	3341	DNAJA2	-1
406	2105	CCL3	1														406	13107	WAPAL	-1
407	2079	CCDC86	1														407	7947	NCBP1	-1
408	1335	C14orf166	1														408	13387	XLOC_003738	-1
409	12537	TRIM56	1														409	7488	MLLT3	-1
410	2075	CCDC82	1														410	3833	ESRRA	0
411	2104	CCL28	1														411	3288	DIP2B	-1
412	2124	CCNK	1														412	12932	USP1	-1
413	2122	CCNJ	1														413	9664	PTPLAD2	-1
414	2137	CCR5	1														414	11855	TBC1D4	-1
415	2135	CCR3	1														415	386	ALDH4A1	1
416	12505	TRIM14	1														416	120	ACBD5	-1
417	2107	CCL4	1														417	3697	ELP3	-1
418	12519	TRIM33	1														418	4428	FPR3	-1
419	2109	CCM2	1														419	2959	CUX2	-1
420	1863	CACNA2D4	1														420	4728	GNAI3	-1
421	2211	CD7	1														421	5927	KIAA0748	-1
422	1607	C22orf46	1														422	3701	EME1	-1
423	13021	VCPIP1	1														423	10259	RNF7	-1
424	13168	WDR70	1														424	2912	CTDSPL2	-1
425	13167	WDR7	1														425	9180	PNO1	-1
426	13000	VAMP5	1														426	7417	MGC42157	1
427	13178	WDR89	1														427	910	ATP6V0E1	1
428	1595	C21orf91	1														428	10251	RNF38	-1
429	13026	VDR	1														429	12270	TMEM62	-1
430	1610	C2CD3	1														430	3744	ENTPD6	-1
431	13031	VEZF1	1														431	10311	RPL17	-1
432	12997	VAMP2	1														432	12438	TPMT	-1
433	1652	C3orf36	1														433	391	ALDOA	1
434	1641	C2orf89	1														434	11548	SSX7	-1
435	12961	USP4	1														435	10372	RPS15A	-0.5
436	12966	USP47	1														436	6197	LANCL1	-1
437	1578	C20orf62	1														437	11503	SRRM1	-1
438	12994	UXT	1														438	10316	RPL22	-1
439	12985	UTP18	1														439	6084	KLRK1	-1
440	13184	WDTC1	1														440	6819	LOC400968	1
441	13027	VEGFA	1														441	11473	SRBD1	-1
442	12947	USP25	1														442	14094	ZBTB33	-1
443	1511	C1orf21	1														443	2351	CELF3	1
444	13107	WAPAL	1														444	364	AKR1E2	-1
445	1532	C1orf87	1														445	3240	DGKZ	-1
446	13104	VWCE	1														446	10710	SERINC1	-1
447	13076	VPS53	1														447	8853	PERP	-1
448	1546	C1QTNF3	1														448	13011	VASP	-1
449	1496	C1orf159	1														449	6805	LOC389273	1
450	1493	C1orf144	1														450	11613	STK38	-1
451	13079	VPS8	1														451	10700	SEPSECS	-1
452	12932	USP1	1														452	8815	PDP1	-1
453	13144	WDR36	1														453	1074	BCL9L	-1
454	13049	VPRBP	1														454	3917	FAM100B	-1
455	13058	VPS25	1														455	5953	KIAA1430	-1
456	1570	C20orf201	1														456	4766	GNS	-1
457	13047	VNN2	1														457	3714	EMR1	1
458	1574	C20orf3	1														458	942	ATXN1	-1
459	13060	VPS26B	1														459	3672	ELAC1	-1
460	1471	C19orf66	1														460	3867	EXOC6B	-1
461	13059	VPS26A	1														461	8540	OSBP	1
462	12960	USP39	1														462	3638	EIF2C4	-1
463	13387	XLOC_003738	1														463	3854	EVL	-1
464	12830	UBL5	1														464	11577	STAMBPL1	-1
465	1795	C8orf83	1														465	7847	MYOF	-1
466	1804	C9orf142	1														466	12360	TNKS1BP1	1
467	1405	C17orf42	1														467	10842	SHFM1	-1
468	12820	UBE3A	1														468	877	ATP2A2	0
469	12817	UBE2V2	1														469	10652	SEC24A	-0.333333
470	12835	UBOX5	1														470	37	AASDH	-1
471	13222	WTAP	1														471	10003	RBMX	0.333333
472	13227	WWP1	1														472	11013	SLC25A46	-1
473	12837	UBQLN1	1														473	3219	DERL2	-1
474	13231	XAF1	1														474	11303	SNRPD3	-1
475	12804	UBE2J2	1														475	9127	PLEKHO2	1
476	1822	C9orf46	1														476	3743	ENTPD5	1
477	1839	C9orf95	1														477	3785	ERAP1	-1
478	12798	UBE2F	1														478	11340	SOCS1	1
479	1413	C17orf59	1														479	10803	SGTB	-1
480	1812	C9orf173	1														480	4702	GLUD1	1
481	1817	C9orf25	1														481	1611	C2CD4C	1
482	1814	C9orf21	1														482	13850	XLOC_l2_008008	1
483	12836	UBP1	1														483	10647	SEC22B	-1
484	12797	UBE2E4P	1														484	163	ACSL5	-1
485	1701	C5orf44	1														485	12513	TRIM26	1
486	1696	C5orf39	1														486	10993	SLC25A25	-1
487	1705	C5orf58	1														487	14103	ZBTB44	-1
488	1704	C5orf56	1														488	10776	SFT2D2	-1
489	1427	C17orf85	1														489	7862	N4BP2L1	1
490	1425	C17orf81	1														490	7582	MRFAP1	1
491	12930	USMG5	1														491	10960	SLC22A14	1
492	1685	C5AR1	1														492	11008	SLC25A40	-1
493	12915	UQCRC2	1														493	10163	RIPK1	-1
494	1436	C18orf25	1														494	12640	TSTD1	-1
495	1716	C6orf120	1														495	10716	SERPINA1	1
496	1746	C6orf81	1														496	11301	SNRPD1	-1
497	1740	C6orf47	1														497	10544	SASH3	-1
498	1755	C7orf29	1														498	2249	CDC42BPB	1
499	12874	UGP2	1														499	8132	NIPAL2	1
500	12871	UGDH	1														500	9534	PRRC1	0
501	1720	C6orf130	1														501	3731	ENOPH1	-1
502	13204	WLS	1														502	14072	ZAP70	-1
503	1722	C6orf136	1														503	12775	UBA6	-1
504	2210	CD69	1														504	7982	NDE1	0
505	10283	RORC	1														505	14024	XXYLT1	0
506	11899	TCEB1	1														506	1029	BAZ1A	-1
507	2743	COX17	1														507	826	ATF1	-1
508	11887	TC2N	1														508	1578	C20orf62	-1
509	2762	CPA3	1														509	7795	MXRA8	-1
510	2778	CPSF3	1														510	10289	RPA4	1
511	11867	TBCEL	1														511	11330	SNX27	-1
512	2741	COX15	1														512	14057	YTHDF2	-1
513	13602	XLOC_010924	1														513	7835	MYO1E	1
514	13610	XLOC_011117	1														514	7818	MYL12B	0
515	13600	XLOC_010897	1														515	11488	SRI	-1
516	11868	TBCK	1														516	12835	UBOX5	-1
517	13623	XLOC_011421	1														517	1701	C5orf44	-1
518	11857	TBC1D7	1														518	7449	MILR1	-1
519	11842	TBC1D15	1														519	5389	HSH2D	0
520	11855	TBC1D4	1														520	9471	PRKRIR	0
521	11912	TCF7	1														521	12871	UGDH	-1
522	11861	TBCA	1														522	11868	TBCK	-1
523	1138	BNC2	1														523	11422	SPICE1	-1
524	2808	CREBZF	1														524	6795	LOC286238	1
525	1154	BPGM	1														525	3356	DNAJC1	-1
526	2843	CRYBG3	1														526	10560	SCAF11	0
527	2617	CMTM2	1														527	10235	RNF213	-0.2
528	12022	THEMIS	1														528	9673	PTPN22	-1
529	2640	CNOT6	1														529	1805	C9orf153	1
530	2626	CNGB1	1														530	9666	PTPMT1	1
531	2645	CNPPD1	1														531	2741	COX15	-1
532	11959	TES	1														532	8979	PIGB	-1
533	12028	THOC5	1														533	11357	SOS2	-1
534	12034	THRAP3	1														534	7322	MED26	1
535	13581	XLOC_010148	1														535	11268	SNORA16B	-1
536	11800	TAP2	1														536	1366	C15orf61	-1
537	11999	TGFBR3	1														537	9967	RBM12	-1
538	1160	BPTF	1														538	8056	NELF	1
539	13599	XLOC_010891	1														539	9582	PSMB8	1
540	11920	TCOF1	1														540	11800	TAP2	-1
541	2733	CORO2A	1														541	6000	KIF5B	-1
542	2735	CORO7	1														542	11393	SPATA5L1	-1
543	1165	BRCC3	1														543	5141	HGD	1
544	2722	COQ10B	1														544	4770	GOLGA4	-1
545	11937	TDRD6	1														545	1112	BIRC6	-1
546	11833	TAX1BP1	1														546	9670	PTPN13	-1
547	2598	CLPS	1														547	10300	RPIA	-1
548	13696	XLOC_013853	1														548	11266	SNF8	1
549	2959	CUX2	1														549	1885	CALML5	1
550	2964	CWF19L1	1														550	11282	SNORA77	-1
551	2963	CWC27	1														551	12734	TXK	-1
552	2968	CXCL1	1														552	9983	RBM3	1
553	2976	CXCR2	1														553	14180	ZFP161	-1
554	11702	SUZ12	1														554	7904	NAP1L1	-1
555	11708	SVIP	1														555	13444	XLOC_005449	-1
556	1096	BEX4	1														556	9942	RASSF3	-1
557	2943	CTU2	1														557	4486	FYN	-1
558	2974	CXCL5	1														558	3596	EFR3A	1
559	2994	CYB561	1														559	7707	MTCH1	1
560	2984	CXorf26	1														560	2297	CDK6	-1
561	11672	SULT1B1	1														561	10389	RPS27L	-1
562	2996	CYB561D2	1														562	5403	HSPA4	-1
563	11734	SYNM	1														563	3406	DOK1	-1
564	11696	SUSD4	1														564	1920	CAPRIN1	-1
565	2982	CXorf21	1														565	7272	MCM7	1
566	11693	SUSD1	1														566	14181	ZFP3	-1
567	1104	BHLHE40	1														567	973	B2M	1
568	1182	BRP44L	1														568	3457	DROSHA	-1
569	13656	XLOC_012444	1														569	1930	CARD17	-1
570	11784	TAF7	1														570	9916	RAPGEF6	-1
571	2899	CTAGE15P	1														571	2005	CCDC114	0
572	11778	TAF4	1														572	613	APOL4	0.333333
573	11764	TADA3	1														573	11438	SPOP	-1
574	2912	CTDSPL2	1														574	1335	C14orf166	1
575	11788	TAGAP	1														575	6714	LOC100652953	1
576	11794	TANC2	1														576	9886	RALA	-1
577	11770	TAF15	1														577	2647	CNPY3	1
578	11799	TAP1	1														578	12422	TP53RK	-1
579	11762	TADA2A	1														579	10228	RNF187	-1
580	1111	BIRC3	1														580	1674	C4orf36	1
581	1112	BIRC6	1														581	3284	DIMT1	-1
582	2937	CTSO	1														582	13356	XLOC_002759	-1
583	11749	SYTL2	1														583	12947	USP25	-1
584	1107	BIN1	1														584	5559	IL18R1	-1
585	2914	CTLA4	1														585	9144	PLSCR3	-1
586	11750	SYTL3	1														586	1010	BAHD1	-1
587	11759	TACO1	1														587	1493	C1orf144	-1
588	1180	BROX	1														588	2669	COG3	1
589	11669	SULF2	1														589	10691	SENP2	1
590	1250	C10orf57	1														590	12255	TMEM45B	-1
591	2328	CEACAM1	1														591	10443	RSL1D1	0
592	2332	CEACAM3	1														592	2165	CD209	0.333333
593	13444	XLOC_005449	1														593	884	ATP5A1	-1
594	1246	C10orf46	1														594	2261	CDCA5	1
595	12294	TMEM93	1														595	13059	VPS26A	-1
596	2321	CDS2	1														596	11366	SP140L	1
597	2316	CDR2	1														597	8600	P2RY6	-1
598	2334	CEACAM7	1														598	10076	RFFL	-1
599	12354	TNIK	1														599	14519	ZNF618	-1
600	12297	TMIGD2	1														600	4996	GUSB	1
601	12269	TMEM60	1														601	11661	SUCLG1	-1
602	12270	TMEM62	1														602	12817	UBE2V2	-1
603	2380	CEP192	1														603	7908	NAPB	1
604	2375	CEP135	1														604	4463	FUNDC1	-1
605	2297	CDK6	1														605	12837	UBQLN1	-1
606	12278	TMEM71	1														606	11430	SPIRE1	1
607	13476	XLOC_006443	1														607	8181	NMT2	-1
608	12274	TMEM65	1														608	10062	REST	-1
609	12341	TNFRSF4	1														609	11444	SPRED3	1
610	2382	CEP350	1														610	5322	HOMER1	1
611	2235	CDC14A	1														611	741	ARMC7	-1
612	2234	CDC123	1														612	1814	C9orf21	-1
613	2242	CDC26	1														613	19	9-Mar	1
614	12422	TP53RK	1														614	8158	NLK	-1
615	12405	TOR1AIP1	1														615	4547	GAPVD1	-1
616	2256	CDC5L	1														616	12003	TGM7	1
617	12425	TP73	1														617	6073	KLK6	1
618	2227	CD96	1														618	4484	FYB	-1
619	12414	TP53AIP1	1														619	11775	TAF1L	1
620	2386	CEP63	1														620	12915	UQCRC2	-1
621	12403	TOPORS	1														621	12366	TNNT2	1
622	12362	TNNC1	1														622	8984	PIGK	-1
623	12372	TNPO3	1														623	10184	RNASEH1	-1
624	2288	CDK2AP2	1														624	10405	RPS6KL1	1
625	2284	CDK19	1														625	10241	RNF220	-1
626	2295	CDK5RAP2	1														626	11842	TBC1D15	-1
627	2258	CDC7	1														627	11537	SSR2	1
628	12383	TOE1	1														628	2842	CRYBB3	1
629	12398	TOP1	1														629	6048	KLHL15	1
630	1234	C10orf118	1														630	10218	RNF166	-1
631	12438	TPMT	1														631	3801	ERGIC3	1
632	2532	CLASP1	1														632	4414	FOXN2	-1
633	2523	CISH	1														633	11959	TES	-1
634	2535	CLC	1														634	2548	CLDN22	1
635	2533	CLASP2	1														635	6026	KLF12	-1
636	12111	TMCC1	1														636	3946	FAM120A	-1
637	12103	TM9SF3	1														637	11555	ST3GAL5	1
638	2519	CIRH1A	1														638	4469	FUT11	-1
639	12124	TMED5	1														639	10033	RDH13	1
640	1195	BST2	1														640	2722	COQ10B	-1
641	13527	XLOC_007814	1														641	4506	GABPA	-1
642	13542	XLOC_008221	1														642	3533	E2F4	-1
643	2578	CLIC5	1														643	1096	BEX4	-1
644	1188	BRWD3	1														644	2948	CUL1	1
645	13558	XLOC_008769	1														645	328	AIFM2	-1
646	12038	THUMPD1	1														646	861	ATOX1	-1
647	12131	TMEM104	1														647	14358	ZNF329	0
648	12102	TM9SF2	1														648	4342	FLJ42351	-1
649	12080	TLE4	1														649	1182	BRP44L	-1
650	12098	TM4SF19	1														650	3171	DDX47	1
651	13530	XLOC_008000	1														651	7047	LTN1	-1
652	2593	CLNS1A	1														652	10493	S100A12	1
653	13497	XLOC_007018	1														653	3792	ERCC3	1
654	12213	TMEM194B	1														654	4368	FLYWCH2	-1
655	2431	CHCHD3	1														655	11784	TAF7	-1
656	2428	CHCHD1	1														656	3440	DPY19L2	-1
657	12182	TMEM167A	1														657	11	5-Mar	-1
658	2467	CHMP4A	1														658	10472	RUNX2	-1
659	1228	BZW1	1														659	14118	ZC3H14	-1
660	2408	CETN3	1														660	12342	TNFRSF6B	1
661	2460	CHM	1														661	11788	TAGAP	-1
662	12255	TMEM45B	1														662	7428	MIB1	-1
663	12179	TMEM161B	1														663	10471	RUNX1	-1
664	12142	TMEM114	1														664	2856	CSF1	-0.333333
665	1212	BTG3	1														665	4381	FNBP1	-1
666	2507	CIAPIN1	1														666	11762	TADA2A	-1
667	2502	CHTF8	1														667	132	ACIN1	1
668	1206	BTBD8	1														668	4637	GGT1	0.2
669	1217	BTN3A1	1														669	11750	SYTL3	-1
670	2482	CHRM4	1														670	8148	NKIRAS2	0
671	2469	CHMP5	1														671	9567	PSMA2	-1
672	10040	RECK	1														672	803	ASNSD1	-1
673	13131	WDR11	1														673	1272	C11orf51	1
674	674	ARHGAP30	1														674	693	ARHGEF19	0
675	8546	OSBPL3	1														675	1246	C10orf46	0
676	8547	OSBPL5	1														676	4904	GRASP	1
677	6196	LAMTOR3	1														677	4272	FGFR1OP2	-0.333333
678	8538	ORMDL3	1														678	6438	LOC100130193	1
679	6201	LAPTM4A	1														679	10089	RG9MTD1	-1
680	6208	LARP7	1														680	7252	MBTPS1	1
681	6173	L2HGDH	1														681	2316	CDR2	-1
682	268	ADSS	1														682	6077	KLRC1	-1
683	6197	LANCL1	1														683	5469	IER5	1
684	8561	OSTF1	1														684	14054	YRDC	-1
685	6231	LCK	1														685	4651	GIMAP4	-1
686	8516	OR6N2	1														686	2235	CDC14A	-1
687	6242	LCOR	1														687	8552	OSCAR	1
688	8467	OR2A12	1														688	9892	RALGDS	-1
689	8609	P4HA2	1														689	5541	IKZF2	-1
690	6215	LATS1	1														690	12658	TTC27	-1
691	14522	ZNF622	1														691	4653	GIMAP6	-1
692	8521	OR7E24	1														692	2256	CDC5L	-1
693	8559	OSTC	1														693	8258	NR1H2	1
694	6258	LEF1	1														694	7873	NAA35	0
695	8600	P2RY6	1														695	9369	PPP2R5A	-1
696	6078	KLRC3	1														696	1991	CCAR1	-1
697	6077	KLRC1	1														697	4671	GK5	-1
698	6080	KLRD1	1														698	12398	TOP1	0
699	6079	KLRC4	1														699	4665	GJA1	-1
700	6084	KLRK1	1														700	1459	C19orf47	1
701	8679	PARP11	1														701	2533	CLASP2	-1
702	292	AGFG2	1														702	1960	CAST	-1
703	6076	KLRB1	1														703	14168	ZER1	-1
704	6082	KLRG1	1														704	12103	TM9SF3	-1
705	6261	LENG1	1														705	11402	SPDYE1	-1
706	8635	PAG1	1														706	10104	RGS12	1
707	8642	PAK1IP1	1														707	2519	CIRH1A	-1
708	275	AFF2	1														708	1581	C20orf85	1
709	6133	KRTAP10-3	1														709	12587	TSC1	-1
710	8611	P4HB	1														710	10445	RSPH3	-1
711	8660	PAPD7	1														711	12124	TMED5	-1
712	8647	PALLD	1														712	9966	RBM10	1
713	8653	PANK2	1														713	4510	GABRB3	-1
714	8441	OMA1	1														714	1228	BZW1	0.333333
715	8688	PARP8	1														715	1881	CALM2	-1
716	8435	OLFM2	1														716	10152	RIMKLB	-1
717	6393	LOC100128670	1														717	2469	CHMP5	0
718	212	ADAMTS10	1														718	13097	VWA1	1
719	8271	NRAS	1														719	4002	FAM173B	-1
720	6400	LOC100129112	1														720	6196	LAMTOR3	-1
721	8268	NR4A1	1														721	12519	TRIM33	-1
722	8267	NR3C2	1														722	4423	FPGS	0
723	8298	NSMCE1	1														723	845	ATG4A	-1
724	8303	NSUN3	1														724	6242	LCOR	-1
725	6403	LOC100129171	1														725	3955	FAM125B	0.333333
726	6366	LOC100127946	1														726	8679	PARP11	-1
727	6442	LOC100130342	1														727	1769	C7orf59	1
728	14573	ZNF703	1														728	12994	UXT	-1
729	8181	NMT2	1														729	10708	SERGEF	-1
730	6458	LOC100130542	1														730	8271	NRAS	0
731	8333	NUDCD2	1														731	14025	XYLT1	-1
732	8266	NR3C1	1														732	357	AKIRIN2	-1
733	6415	LOC100129408	1														733	9503	PRPF31	0
734	203	ADAM12	1														734	10685	SEMA4F	-1
735	8325	NUB1	1														735	356	AKIRIN1	-0.333333
736	8689	PARP9	1
737	8332	NUDC	1
738	238	ADCY9	1
739	239	ADD1	1
740	8405	OBSCN	1
741	237	ADCY7	1
742	8393	OAS1	1
743	8372	NUP62CL	1
744	8413	OCR1	1
745	6268	LEPROT	1
746	8404	OBP2B	1
747	8424	OGDH	1
748	8364	NUP210	1
749	229	ADC	1
750	6350	LMNB1	1
751	6338	LLPH	1
752	223	ADAR	1
753	8369	NUP50	1
754	8367	NUP37	1
755	6310	LIMA1	1
756	8685	PARP3	1
757	8158	NLK	1
758	363	AKR1C3	1
759	364	AKR1E2	1
760	5829	KCNH6	1
761	8922	PHC3	1
762	357	AKIRIN2	1
763	356	AKIRIN1	1
764	8924	PHF10	1
765	8925	PHF11	1
766	5831	KCNJ1	1
767	5816	KCNA3	1
768	8853	PERP	1
769	350	AKAP7	1
770	345	AKAP12	1
771	8844	PELI2	1
772	8938	PHF3	1
773	8912	PGRMC2	1
774	8869	PEX6	1
775	8877	PFDN5	1
776	8928	PHF14	1
777	343	AKAP10	1
778	5811	KBTBD2	1
779	5743	ITPK1	1
780	5740	ITM2B	1
781	388	ALDH6A1	1
782	8984	PIGK	1
783	5755	IVNS1ABP	1
784	5761	JAK3	1
785	5738	ITK	1
786	5723	ITGAV	1
787	8979	PIGB	1
788	341	AK5	1
789	8945	PHKA2	1
790	8964	PI4K2B	1
791	5795	KANSL2	1
792	14407	ZNF436	1
793	5797	KARS	1
794	8972	PICALM	1
795	8968	PIAS2	1
796	5770	JKAMP	1
797	344	AKAP11	1
798	6499	LOC100131662	1
799	5892	KEAP1	1
800	5996	KIF3A	1
801	5995	KIF2A	1
802	6009	KIR2DL4	1
803	6000	KIF5B	1
804	6019	KIRREL3	1
805	305	AGPS	1
806	8749	PCNA	1
807	5990	KIF22	1
808	6011	KIR2DS2	1
809	8760	PCSK5	1
810	300	AGPAT4	1
811	6038	KLHDC10	1
812	8709	PBX3	1
813	6048	KLHL15	1
814	8763	PCTP	1
815	6020	KIT	1
816	6026	KLF12	1
817	303	AGPAT9	1
818	14469	ZNF557	1
819	6059	KLHL29	1
820	14468	ZNF555	1
821	5927	KIAA0748	1
822	5922	KIAA0513	1
823	8813	PDLIM5	1
824	8815	PDP1	1
825	328	AIFM2	1
826	5937	KIAA0947	1
827	14435	ZNF498	1
828	672	ARHGAP26	1
829	8809	PDK3	1
830	5903	KIAA0146	1
831	8783	PDE3B	1
832	5953	KIAA1430	1
833	5965	KIAA1715	1
834	5964	KIAA1704	1
835	5969	KIAA1797	1
836	5945	KIAA1257	1
837	8792	PDE6H	1
838	5946	KIAA1267	1
839	8177	NMI	1
840	5720	ITGAE	1
841	7047	LTN1	1
842	7045	LTF	1
843	7065	LYAR	1
844	7554	MPHOSPH8	1
845	7524	MOB3C	1
846	65	ABCD3	1
847	7574	MPV17L2	1
848	7035	LTA	1
849	7535	MOP-1	1
850	7578	MPZL3	1
851	7129	MALT1	1
852	14663	ZNF879	1
853	7464	MKL1	1
854	7151	MAP1B	1
855	7583	MRFAP1L1	1
856	7101	MADD	1
857	7123	MAGOH	1
858	7488	MLLT3	1
859	7577	MPZL2	1
860	7162	MAP2K7	1
861	7579	MR1	1
862	6936	LPIN2	1
863	7659	MRPS35	1
864	7642	MRPS17	1
865	6937	LPP	1
866	90	ABL1	1
867	6961	LRP8	1
868	6932	LPGAT1	1
869	6926	LPAR5	1
870	7640	MRPS15	1
871	7171	MAP3K4	1
872	7008	LRRFIP2	1
873	7003	LRRC8C	1
874	7013	LRRN3	1
875	82	ABHD3	1
876	7023	LSM14A	1
877	7635	MRPL9	1
878	7609	MRPL3	1
879	6987	LRRC4	1
880	7456	MIS12	1
881	6920	LONRF1	1
882	7453	MINPP1	1
883	7264	MCFD2	1
884	7257	MCAT	1
885	17	8-Mar	1
886	20	9-Sep	1
887	7291	MDH2	1
888	7293	MDM1	1
889	7248	MBOAT4	1
890	24	A2M	1
891	7371	METTL23	1
892	7244	MBNL1	1
893	7315	MED19	1
894	7311	MED15	1
895	7328	MED4	1
896	7317	MED21	1
897	7229	MATR3	1
898	7297	MDP1	1
899	7349	MESDC1	1
900	11	5-Mar	1
901	7399	MFSD5	1
902	6916	LOC731932	1
903	7239	MBD5	1
904	44	ABCA3	1
905	7190	MAPK14	1
906	7200	MAPKAP1	1
907	43	ABCA2	1
908	7206	MAPRE2	1
909	38	AASDHPPT	1
910	7444	MIER2	1
911	7175	MAP3K8	1
912	7430	MICA	1
913	7174	MAP3K7	1
914	7212	MARK3	1
915	7211	MARK2	1
916	7225	MAT2B	1
917	7416	MGC40069	1
918	30	AAGAB	1
919	37	AASDH	1
920	7208	MARCKS	1
921	7428	MIB1	1
922	6924	LPAR1	1
923	5909	KIAA0232	1
924	8014	NDUFB10	1
925	8017	NDUFB3	1
926	8009	NDUFAF1	1
927	163	ACSL5	1
928	6648	LOC100506915	1
929	7989	NDRG1	1
930	6622	LOC100506191	1
931	6615	LOC100506047	1
932	6647	LOC100506906	1
933	6585	LOC100289388	1
934	6673	LOC100507448	1
935	14604	ZNF766	1
936	7967	NCOA6	1
937	7968	NCOA7	1
938	8055	NEK9	1
939	7985	NDFIP2	1
940	6671	LOC100507419	1
941	6670	LOC100507404	1
942	6587	LOC100291323	1
943	6694	LOC100652727	1
944	14592	ZNF74	1
945	8107	NGDN	1
946	8131	NIPA2	1
947	184	ACTR2	1
948	185	ACTR3	1
949	6559	LOC100287221	1
950	8080	NFATC3	1
951	8132	NIPAL2	1
952	192	ACVR1	1
953	6546	LOC100134256	1
954	6703	LOC100652784	1
955	8073	NF2	1
956	6564	LOC100287329	1
957	6576	LOC100288997	1
958	8069	NEUROG1	1
959	8058	NELL2	1
960	180	ACTN4	1
961	14585	ZNF728	1
962	6562	LOC100287313	1
963	7963	NCOA2	1
964	8146	NKG7	1
965	7955	NCK1	1
966	7796	MYADM	1
967	120	ACBD5	1
968	6822	LOC401480	1
969	6821	LOC401433	1
970	6844	LOC642335	1
971	6854	LOC644285	1
972	6812	LOC400128	1
973	7799	MYBBP1A	1
974	7787	MVP	1
975	7805	MYCBP	1
976	7681	MSH6	1
977	7690	MSRA	1
978	14639	ZNF816	1
979	7672	MS4A3	1
980	7811	MYH10	1
981	7743	MTO1	1
982	6877	LOC648044	1
983	7742	MTMR9	1
984	7800	MYBL1	1
985	7671	MS4A2	1
986	7810	MYEOV2	1
987	7925	NBAS	1
988	7927	NBEAL1	1
989	7905	NAP1L4	1
990	7918	NAT1	1
991	7891	NAE1	1
992	6752	LOC202025	1
993	144	ACOX2	1
994	7940	NCAN	1
995	6750	LOC200726	1
996	7947	NCBP1	1
997	7861	N4BP2	1
998	7866	NAA10	1
999	14620	ZNF783	1
1000	6789	LOC286058	1
1001	7835	MYO1E	1
1002	14616	ZNF780A	1
1003	7872	NAA30	1
1004	7889	NADKD1	1
1005	14394	ZNF414	1
1006	673	ARHGAP27	1
1007	9675	PTPN4	1
1008	5127	HERC6	1
1009	9673	PTPN22	1
1010	5139	HEXIM2	1
1011	5129	HERPUD2	1
1012	9660	PTP4A2	1
1013	5126	HERC5	1
1014	9670	PTPN13	1
1015	5113	HELB	1
1016	9664	PTPLAD2	1
1017	5170	HIPK2	1
1018	9645	PTGIR	1
1019	14265	ZNF160	1
1020	5112	HEG1	1
1021	5165	HINT2	1
1022	9648	PTGS2	1
1023	544	ANXA3	1
1024	5116	HELZ	1
1025	9605	PSME1	1
1026	5059	HBS1L	1
1027	9743	Q25LE9	1
1028	5065	HCFC1	1
1029	9726	PXN	1
1030	578	APBB1	1
1031	5074	HDAC1	1
1032	5042	HAUS2	1
1033	5069	HCLS1	1
1034	9593	PSMD11	1
1035	5073	HCST	1
1036	9703	PUM1	1
1037	9716	PVRL1	1
1038	5103	HEATR7B1	1
1039	561	AP2A1	1
1040	5098	HEATR3	1
1041	14251	ZNF135	1
1042	5085	HDC	1
1043	5172	HIRA	1
1044	9775	Q9EPR2	1
1045	9599	PSMD4	1
1046	9460	PRKCH	1
1047	9466	PRKD3	1
1048	9455	PRKCB	1
1049	9438	PRIM1	1
1050	9462	PRKCQ	1
1051	503	ANKRD32	1
1052	9469	PRKRA	1
1053	5295	HN1	1
1054	5263	HLA-F	1
1055	5301	HNRNPA1L2	1
1056	5330	HORMAD1	1
1057	9428	PREP	1
1058	9412	PRDM10	1
1059	9483	PRNP	1
1060	5318	HNRNPUL2	1
1061	5307	HNRNPD	1
1062	5310	HNRNPH2	1
1063	5265	HLCS	1
1064	588	APH1A	1
1065	9569	PSMA4	1
1066	9573	PSMB1	1
1067	5208	HIST1H3E	1
1068	5213	HIST1H3J	1
1069	5206	HIST1H3C	1
1070	9531	PRR5	1
1071	9586	PSMC3	1
1072	9567	PSMA2	1
1073	9589	PSMC5	1
1074	9532	PRR5L	1
1075	5242	HKDC1	1
1076	5237	HIVEP2	1
1077	9511	PRPF6	1
1078	9498	PROSER1	1
1079	5239	HK1	1
1080	5230	HIST2H3A	1
1081	14287	ZNF207	1
1082	9766	Q8SQ10	1
1083	9402	PRAMEF7	1
1084	9779	QDPR	1
1085	647	ARFGAP2	1
1086	4786	GOLT1B	1
1087	9978	RBM23	1
1088	14197	ZFYVE16	1
1089	4788	GOPC	1
1090	9967	RBM12	1
1091	4785	GOLPH3L	1
1092	14196	ZFYVE1	1
1093	14192	ZFPL1	1
1094	4800	GPA33	1
1095	9952	RB1CC1	1
1096	9964	RBL1	1
1097	4832	GPR108	1
1098	9999	RBM8A	1
1099	4828	GPN1	1
1100	14199	ZFYVE20	1
1101	9965	RBL2	1
1102	4784	GOLPH3	1
1103	9942	RASSF3	1
1104	14180	ZFP161	1
1105	14179	ZFP106	1
1106	14181	ZFP3	1
1107	10029	RCSD1	1
1108	4714	GMFB	1
1109	4728	GNAI3	1
1110	671	ARHGAP25	1
1111	4722	GMPS	1
1112	629	AQP3	1
1113	10026	RCOR1	1
1114	658	ARHGAP1	1
1115	10016	RCAN3	1
1116	4750	GNGT2	1
1117	10012	RC3H1	1
1118	10014	RCAN1	1
1119	4730	GNAO1	1
1120	4745	GNG2	1
1121	14204	ZFYVE9	1
1122	9610	PSMG1	1
1123	9927	RASA3	1
1124	14228	ZMYM3	1
1125	4960	GTDC1	1
1126	9824	RAB33A	1
1127	9819	RAB2A	1
1128	4961	GTF2A1	1
1129	4972	GTF2H5	1
1130	4956	GSTP1	1
1131	14230	ZMYM5	1
1132	4943	GSPT2	1
1133	9818	RAB28	1
1134	591	APIP	1
1135	14236	ZMYND17	1
1136	9797	RAB11B	1
1137	14223	ZMIZ1	1
1138	9807	RAB18	1
1139	9809	RAB1A	1
1140	14234	ZMYND11	1
1141	9838	RAB43	1
1142	5002	GYPC	1
1143	9905	RANGRF	1
1144	9916	RAPGEF6	1
1145	4880	GPR97	1
1146	9891	RALGAPB	1
1147	4868	GPR52	1
1148	4904	GRASP	1
1149	9922	RARRES3	1
1150	4886	GPRIN3	1
1151	4852	GPR171	1
1152	9886	RALA	1
1153	4937	GSDMD	1
1154	614	APOL6	1
1155	9849	RAB8A	1
1156	9846	RAB6C	1
1157	4928	GRM4	1
1158	9865	RAC1	1
1159	9864	RABL3	1
1160	14306	ZNF235	1
1161	13129	WDPCP	1
1162	9373	PPP2R5E	1
1163	5473	IFI16	1
1164	9135	PLLP	1
1165	14325	ZNF267	1
1166	5554	IL17RB	1
1167	5469	IER5	1
1168	9259	POP4	1
1169	5591	IL7R	1
1170	5482	IFIT1	1
1171	5483	IFIT2	1
1172	9104	PLEKHA1	1
1173	5593	ILDR1	1
1174	9241	POLR3B	1
1175	5658	IPO5	1
1176	5561	IL1B	1
1177	5559	IL18R1	1
1178	9042	PJA2	1
1179	471	ANK3	1
1180	9281	PPA1	1
1181	9239	POLR2L	1
1182	9150	PLXNA4	1
1183	5464	IDS	1
1184	9187	PNPLA8	1
1185	5659	IPO7	1
1186	5485	IFIT5	1
1187	430	AMBRA1	1
1188	14340	ZNF286B	1
1189	5541	IKZF2	1
1190	9131	PLIN4	1
1191	14373	ZNF350	1
1192	5635	INSIG1	1
1193	9213	POLE4	1
1194	5614	ING3	1
1195	9105	PLEKHA2	1
1196	9110	PLEKHF1	1
1197	5544	IL10RA	1
1198	5539	IKBKG	1
1199	9070	PLA2G6	1
1200	9217	POLI	1
1201	5513	IGF1R	1
1202	445	AMPD2	1
1203	444	AMOTL1	1
1204	9180	PNO1	1
1205	5510	IGANRP	1
1206	5508	IFT80	1
1207	5547	IL12RB1	1
1208	9192	POC1B	1
1209	9222	POLR1A	1
1210	455	ANAPC13	1
1211	9295	PPCS	1
1212	421	ALPK1	1
1213	5693	ISCA2	1
1214	5710	ITFG1	1
1215	14382	ZNF384	1
1216	5697	ISG20L2	1
1217	9335	PPP1R12A	1
1218	5582	IL32	1
1219	9347	PPP1R2	1
1220	9334	PPP1R11	1
1221	9331	PPP1CB	1
1222	9034	PITPNC1	1
1223	9371	PPP2R5C	1
1224	5704	ISPD	1
1225	14352	ZNF32	1
1226	5707	ISY1-RAB43	1
1227	5709	ITCH	1
1228	9369	PPP2R5A	1
1229	14309	ZNF24	1
1230	9360	PPP2R1A	1
1231	5391	HSP90AA2	1
1232	5624	INPP4A	1
1233	5377	HSD17B10	1
1234	9154	PM20D1	1
1235	477	ANKHD1-EIF4EBP3	1
1236	9169	PMVK	1
1237	14320	ZNF26	1
1238	435	AMH	1
1239	5694	ISCU	1
1240	9305	PPIB	1
1241	9156	PMAIP1	1
1242	9035	PITPNM1	1
1243	9159	PMF1	1
1244	431	AMD1	1
1245	5416	HSPH1	1
1246	9372	PPP2R5D	1
1247	5834	KCNJ15	0.75
1248	7766	MUC16	0.75
1249	3038	CYP4F2	0.75
1250	1970	CBLB	0.75
1251	4872	GPR65	0.75
1252	1821	C9orf41	0.75
1253	3469	DTHD1	0.75
1254	6847	LOC642947	0.75
1255	10280	ROPN1L	0.75
1256	1968	CBFB	0.75
1257	12653	TTC21B	0.75
1258	8830	PDZD4	0.75
1259	11568	ST8SIA6	0.75
1260	12682	TTI2	0.75
1261	10364	RPRD2	0.75
1262	7139	MAN1C1	0.75
1263	7651	MRPS25	0.75
1264	3114	DCP1B	0.75
1265	12711	TUBD1	0.75
1266	3122	DCTN5	0.75
1267	3043	CYSLTR1	0.75
1268	3054	D4S234E	0.75
1269	5882	KDM4A	0.75
1270	11605	STK17B	0.75
1271	8861	PEX13	0.75
1272	8903	PGLYRP1	0.75
1273	7678	MSH2	0.75
1274	3082	DBP	0.75
1275	6999	LRRC6	0.75
1276	5851	KCNRG	0.75
1277	3039	CYP4F3	0.75
1278	7736	MTMR2	0.75
1279	10281	RORA	0.75
1280	9147	PLXDC1	0.75
1281	9877	RAD51C	0.75
1282	12752	TXNRD1	0.75
1283	10292	RPAP2	0.75
1284	11184	SMAD2	0.75
1285	10399	RPS6KA3	0.75
1286	13003	VANGL1	0.75
1287	4627	GFPT1	0.75
1288	10101	RGS1	0.75
1289	5767	JAZF1	0.75
1290	4762	GNPTAB	0.75
1291	7408	MGAT4A	0.75
1292	3396	DOCK10	0.75
1293	7383	MFAP1	0.75
1294	7275	MCMBP	0.75
1295	9993	RBM45	0.75
1296	5787	JUN	0.75
1297	12988	UTP3	0.75
1298	9049	PKIA	0.75
1299	1635	C2orf74	0.75
1300	5762	JAKMIP1	0.75
1301	4792	GOSR1	0.75
1302	13080	VRK1	0.75
1303	7308	MED13	0.75
1304	9021	PION	0.75
1305	9022	PIP4K2A	0.75
1306	4684	GLMN	0.75
1307	7313	MED17	0.75
1308	9006	PIK3R1	0.75
1309	4594	GCNT1	0.75
1310	8983	PIGH	0.75
1311	7353	METAP2	0.75
1312	11398	SPCS2	0.75
1313	11342	SOCS3	0.75
1314	7376	METTL5	0.75
1315	1566	C20orf177	0.75
1316	10130	RHOBTB3	0.75
1317	8917	PHAX	0.75
1318	12850	UBXN2B	0.75
1319	12840	UBR1	0.75
1320	7128	MAL	0.75
1321	4515	GADD45B	0.75
1322	10211	RNF144A	0.75
1323	3192	DEFA3	0.75
1324	7498	MME	0.75
1325	1735	C6orf228	0.75
1326	4529	GALM	0.75
1327	7513	MMS19	0.75
1328	9951	RB1	0.75
1329	7527	MOCS2	0.75
1330	12832	UBLCP1	0.75
1331	7055	LY6E	0.75
1332	10202	RNF125	0.75
1333	10236	RNF214	0.75
1334	4812	GPBP1L1	0.75
1335	11279	SNORA70B	0.75
1336	1671	C4orf32	0.75
1337	7439	MID1IP1	0.75
1338	8939	PHF5A	0.75
1339	11496	SRPK1	0.75
1340	5653	IPCEF1	0.75
1341	12949	USP28	0.75
1342	7462	MKI67IP	0.75
1343	8929	PHF15	0.75
1344	11518	SRSF8	0.75
1345	3429	DPM1	0.75
1346	1712	C6orf105	0.75
1347	4531	GALNT1	0.75
1348	4356	FLJ46446	0.75
1349	5349	HPGD	0.75
1350	9808	RAB19	0.75
1351	10757	SF3A1	0.75
1352	2452	CHI3L1	0.75
1353	12242	TMEM30A	0.75
1354	3980	FAM157B	0.75
1355	8302	NSUN2	0.75
1356	3975	FAM153A	0.75
1357	8311	NT5C3L	0.75
1358	8294	NSF	0.75
1359	2434	CHCHD6	0.75
1360	11820	TAS2R4	0.75
1361	8330	NUCB2	0.75
1362	6363	LOC100127886	0.75
1363	5448	ICK	0.75
1364	3716	EMR3	0.75
1365	12153	TMEM128	0.75
1366	11827	TAS2R60	0.75
1367	6323	LINC00085	0.75
1368	9616	PSPHP1	0.75
1369	12311	TMTC2	0.75
1370	6527	LOC100132686	0.75
1371	6013	KIR2DS4	0.75
1372	8133	NIPAL3	0.75
1373	6505	LOC100131860	0.75
1374	10706	SERF1B	0.75
1375	2491	CHST11	0.75
1376	11369	SP4	0.75
1377	3698	ELP4	0.75
1378	2341	CEBPZ	0.75
1379	8228	NPCDR1	0.75
1380	11786	TAF9	0.75
1381	4004	FAM175A	0.75
1382	11797	TAOK2	0.75
1383	2486	CHRNA5	0.75
1384	12370	TNPO1	0.75
1385	8597	P2RY14	0.75
1386	2642	CNOT7	0.75
1387	9362	PPP2R2A	0.75
1388	6219	LBR	0.75
1389	6217	LAX1	0.75
1390	5325	HOMEZ	0.75
1391	10864	SIGLEC1	0.75
1392	6232	LCLAT1	0.75
1393	2628	CNIH4	0.75
1394	8634	PAFAH2	0.75
1395	3832	ESRP2	0.75
1396	2658	CNTNAP3	0.75
1397	2672	COG6	0.75
1398	6181	LAG3	0.75
1399	9382	PPP6C	0.75
1400	2594	CLOCK	0.75
1401	9663	PTPLAD1	0.75
1402	11874	TBL2	0.75
1403	10808	SH2D1B	0.75
1404	2505	CHURC1	0.75
1405	5418	HTATSF1	0.75
1406	12134	TMEM106B	0.75
1407	2799	CREB1	0.75
1408	9485	PRO0628	0.75
1409	6322	LIN9	0.75
1410	6107	KRT23	0.75
1411	8439	OLIG1	0.75
1412	2764	CPD	0.75
1413	9445	PRKACB	0.75
1414	8428	OGFRL1	0.75
1415	3874	EXOSC3	0.75
1416	8638	PAIP1	0.75
1417	5156	HIF1A	0.75
1418	3022	CYP20A1	0.75
1419	12518	TRIM32	0.75
1420	10519	SAMD12	0.75
1421	9739	PZP	0.75
1422	11119	SLC4A10	0.75
1423	2687	COL4A3BP	0.75
1424	9737	PYROXD1	0.75
1425	5062	HCAR2	0.75
1426	11151	SLC7A8	0.75
1427	6723	LOC100653120	0.75
1428	6766	LOC283501	0.75
1429	12499	TRIB1	0.75
1430	2158	CD177	0.75
1431	2973	CXCL3	0.75
1432	10520	SAMD3	0.75
1433	12491	TREM1	0.75
1434	5054	HBD	0.75
1435	4221	FCGBP	0.75
1436	2062	CCDC65	0.75
1437	7824	MYLIP	0.75
1438	4989	GTPBP8	0.75
1439	5910	KIAA0240	0.75
1440	5915	KIAA0355	0.75
1441	5007	GZMB	0.75
1442	3005	CYB5RL	0.75
1443	10524	SAMD9	0.75
1444	2067	CCDC71	0.75
1445	9759	Q7Z2X8	0.75
1446	12560	TRMT12	0.75
1447	5926	KIAA0586	0.75
1448	2078	CCDC85C	0.75
1449	4281	FHIT	0.75
1450	10473	RUNX3	0.75
1451	12486	TRAPPC6B	0.75
1452	2025	CCDC144A	0.75
1453	8061	NEO1	0.75
1454	12415	TP53BP1	0.75
1455	10614	SCYL3	0.75
1456	2220	CD83	0.75
1457	12428	TPD52	0.75
1458	2226	CD93	0.75
1459	4120	FAM8A1	0.75
1460	10596	SCN8A	0.75
1461	4108	FAM78A	0.75
1462	4148	FAS	0.75
1463	2241	CDC25B	0.75
1464	2932	CTSF	0.75
1465	2255	CDC42SE2	0.75
1466	5516	IGF2R	0.75
1467	12400	TOP2B	0.75
1468	11725	SYNE2	0.75
1469	4060	FAM32A	0.75
1470	3608	EGR3	0.75
1471	9700	PTX3	0.75
1472	3597	EFR3B	0.75
1473	5080	HDAC5	0.75
1474	3606	EGR1	0.75
1475	2182	CD300LF	0.75
1476	4197	FBXO36	0.75
1477	2175	CD28	0.75
1478	12474	TRAM1	0.75
1479	9688	PTPRM	0.75
1480	2197	CD40LG	0.75
1481	10562	SCAF8	0.75
1482	10563	SCAI	0.75
1483	2207	CD6	0.75
1484	4170	FBXL16	0.75
1485	5718	ITGA6	0.75
1486	7335	MEF2BNB	0.75
1487	165	ACSM2A	0.75
1488	295	AGL	0.75
1489	789	ASCC1	0.75
1490	296	AGMAT	0.75
1491	14156	ZDHHC21	0.75
1492	836	ATG10	0.75
1493	14508	ZNF599	0.75
1494	14065	YY1	0.75
1495	14575	ZNF71	0.75
1496	1332	C14orf142	0.75
1497	1329	C14orf129	0.75
1498	13682	XLOC_013318	0.75
1499	13918	XLOC_l2_011692	0.75
1500	14312	ZNF250	0.75
1501	941	ATRX	0.75
1502	14517	ZNF615	0.75
1503	991	B4GALT5	0.75
1504	1377	C16orf54	0.75
1505	14540	ZNF654	0.75
1506	1078	BCORL1	0.75
1507	79	ABHD15	0.75
1508	1159	BPNT1	0.75
1509	13567	XLOC_009233	0.75
1510	14652	ZNF841	0.75
1511	394	ALG10	0.75
1512	13686	XLOC_013531	0.75
1513	1223	BUB3	0.75
1514	13296	XLOC_001214	0.75
1515	13903	XLOC_l2_010908	0.75
1516	1301	C12orf35	0.75
1517	441	AMMECR1L	0.75
1518	14674	ZNHIT3	0.75
1519	64	ABCD2	0.75
1520	13223	WTH3DI	0.75
1521	1431	C17orf97	0.75
1522	13636	XLOC_011801	0.75
1523	13830	XLOC_l2_007025	0.75
1524	14008	XPO4	0.75
1525	13754	XLOC_l2_000941	0.75
1526	13976	XLOC_l2_014830	0.75
1527	134	ACN9	0.75
1528	1434	C18orf19	0.75
1529	1232	C10orf111	0.75
1530	14609	ZNF772	0.75
1531	110	ACADSB	0.75
1532	14680	ZRANB3	0.75
1533	14022	XRN2	0.75
1534	14260	ZNF148	0.75
1535	13587	XLOC_010449	0.75
1536	14496	ZNF585A	0.75
1537	13793	XLOC_l2_004157	0.75
1538	13234	XCL1	0.75
1539	1395	C16orf91	0.75
1540	1316	C12orf65	0.75
1541	13832	XLOC_l2_007062	0.75
1542	13831	XLOC_l2_007034	0.75
1543	13904	XLOC_l2_010915	0.75
1544	882	ATP2B4	0.75
1545	92	ABLIM1	0.75
1546	14580	ZNF718	0.75
1547	13863	XLOC_l2_008692	0.75
1548	817	ATAD1	0.75
1549	960	AUTS2	0.75
1550	511	ANKRD40	0.75
1551	13540	XLOC_008174	0.75
1552	13700	XLOC_013921	0.75
1553	14515	ZNF613	0.75
1554	14292	ZNF217	0.75
1555	14300	ZNF227	0.75
1556	13707	XLOC_014047	0.75
1557	808	ASPRV1	0.75
1558	14541	ZNF655	0.75
1559	14296	ZNF223	0.75
1560	13254	XLOC_000357	0.75
1561	14643	ZNF823	0.75
1562	862	ATP10A	0.6556
1563	7782	MUT	0.6556
1564	2164	CD200R1	0.6556
1565	14461	ZNF546	0.6556
1566	6034	KLF7	0.6556
1567	13344	XLOC_002221	0.6556
1568	12494	TRERF1	0.6556
1569	5444	ICAM1	0.6556
1570	5450	ICOS	0.6556
1571	12508	TRIM21	0.6556
1572	1309	C12orf5	0.6556
1573	8778	PDCL	0.6556
1574	10780	SFTPC	0.6556
1575	10591	SCML1	0.6556
1576	14020	XRCC6BP1	0.6556
1577	2132	CCR1	0.6556
1578	14018	XRCC5	0.6556
1579	4140	FANK1	0.6556
1580	2139	CCR7	0.6556
1581	7747	MTR	0.6556
1582	2144	CCT2	0.6556
1583	3983	FAM160A1	0.6556
1584	9312	PPIL1	0.6556
1585	13797	XLOC_l2_004371	0.6556
1586	3976	FAM153B	0.6556
1587	5311	HNRNPH3	0.6556
1588	9320	PPM1D	0.6556
1589	11934	TDP1	0.6556
1590	11935	TDP2	0.6556
1591	88	ABI2	0.6556
1592	12498	TRIAP1	0.6556
1593	8766	PCYT1A	0.6556
1594	3957	FAM126B	0.6556
1595	10764	SF3B4	0.6556
1596	9429	PREPL	0.6556
1597	9301	PPHLN1	0.6556
1598	9304	PPIAL4G	0.6556
1599	8299	NSMCE2	0.6556
1600	8771	PDCD10	0.6556
1601	6336	LIX1L	0.6556
1602	6957	LRP10	0.6556
1603	3942	FAM117A	0.6556
1604	5494	IFNG	0.6556
1605	10581	SCFD1	0.6556
1606	13823	XLOC_l2_006648	0.6556
1607	5498	IFRD2	0.6556
1608	5951	KIAA1370	0.6556
1609	12444	TPR	0.6556
1610	5504	IFT46	0.6556
1611	3296	DISC1	0.6556
1612	322	AHSA1	0.6556
1613	13825	XLOC_l2_006797	0.6556
1614	12446	TPRKB	0.6556
1615	10826	SH3GLB1	0.6556
1616	1278	C11orf65	0.6556
1617	7840	MYO6	0.6556
1618	6780	LOC284630	0.6556
1619	2231	CDA	0.6556
1620	7624	MRPL45	0.6556
1621	7841	MYO7A	0.6556
1622	10834	SH3YL1	0.6556
1623	6785	LOC285178	0.6556
1624	11955	TERF1	0.6556
1625	8292	NSD1	0.6556
1626	6967	LRRC14	0.6556
1627	13374	XLOC_003095	0.6556
1628	10790	SGK223	0.6556
1629	3935	FAM113B	0.6556
1630	7627	MRPL48	0.6556
1631	9266	POTEB	0.6556
1632	12464	TRAF3IP1	0.6556
1633	7790	MXD1	0.6556
1634	6814	LOC400541	0.6556
1635	9288	PPAPDC2	0.6556
1636	11424	SPIN2B	0.6556
1637	10793	SGMS1	0.6556
1638	816	ASXL2	0.6556
1639	6815	LOC400682	0.6556
1640	462	ANGEL2	0.6556
1641	2199	CD46	0.6556
1642	14005	XPNPEP2	0.6556
1643	10807	SH2D1A	0.6556
1644	7809	MYEF2	0.6556
1645	5962	KIAA1671	0.6556
1646	2194	CD3G	0.6556
1647	6384	LOC100128386	0.6556
1648	1974	CBR1	0.6556
1649	2130	CCP110	0.6556
1650	2030	CCDC152	0.6556
1651	7654	MRPS28	0.6556
1652	6359	LNPEP	0.6556
1653	14310	ZNF248	0.6556
1654	6360	LNX1	0.6556
1655	7674	MS4A4E	0.6556
1656	14647	ZNF831	0.6556
1657	4056	FAM25A	0.6556
1658	7656	MRPS31	0.6556
1659	12577	TRPM6	0.6556
1660	9389	PPT1	0.6556
1661	4103	FAM73A	0.6556
1662	5372	HS3ST3B1	0.6556
1663	13786	XLOC_l2_003599	0.6556
1664	2063	CCDC66	0.6556
1665	2742	COX16	0.6556
1666	7683	MSL1	0.6556
1667	14311	ZNF25	0.6556
1668	6910	LOC729887	0.6556
1669	4106	FAM76A	0.6556
1670	10687	SEMA6A	0.6556
1671	485	ANKRD12	0.6556
1672	2060	CCDC64	0.6556
1673	9386	PPPDE1	0.6556
1674	11891	TCEA3	0.6556
1675	2026	CCDC146	0.6556
1676	1030	BAZ1B	0.6556
1677	491	ANKRD17	0.6556
1678	11896	TCEAL8	0.6556
1679	6008	KIR2DL2	0.6556
1680	1150	BOLA3	0.6556
1681	12603	TSHZ3	0.6556
1682	10655	SEC24D	0.6556
1683	4083	FAM55C	0.6556
1684	492	ANKRD18A	0.6556
1685	6923	LPA	0.6556
1686	10697	SEPHS2	0.6556
1687	14475	ZNF564	0.6556
1688	14030	YBEY	0.6556
1689	831	ATF6	0.6556
1690	493	ANKRD18B	0.6556
1691	11903	TCERG1	0.6556
1692	5347	HP1BP3	0.6556
1693	1343	C14orf38	0.6556
1694	6001	KIF5C	0.6556
1695	12585	TRUB1	0.6556
1696	8741	PCGF6	0.6556
1697	8748	PCMTD2	0.6556
1698	6033	KLF6	0.6556
1699	12523	TRIM37	0.6556
1700	14301	ZNF23	0.6556
1701	10607	SCRN3	0.6556
1702	2114	CCND2	0.6556
1703	14315	ZNF254	0.6556
1704	12521	TRIM35	0.6556
1705	850	ATG7	0.6556
1706	5399	HSPA14	0.6556
1707	1324	C14orf101	0.6556
1708	2106	CCL3L3	0.6556
1709	14316	ZNF256	0.6556
1710	10720	SERPINB10	0.6556
1711	5353	HPS3	0.6556
1712	11431	SPN	0.6556
1713	3270	DHX36	0.6556
1714	3990	FAM164A	0.6556
1715	854	ATIC	0.6556
1716	12530	TRIM43	0.6556
1717	8764	PCYOX1	0.6556
1718	4000	FAM172A	0.6556
1719	1320	C13orf15	0.6556
1720	1321	C13orf27	0.6556
1721	7718	MTFMT	0.6556
1722	7641	MRPS16	0.6556
1723	14483	ZNF571	0.6556
1724	12559	TRMT112	0.6556
1725	11454	SPRYD3	0.6556
1726	10702	SEPX1	0.6556
1727	13323	XLOC_001797	0.6556
1728	7705	MTA3	0.6556
1729	14035	YEATS4	0.6556
1730	9351	PPP1R3B	0.6556
1731	7691	MSRB2	0.6556
1732	4041	FAM204A	0.6556
1733	10704	SERBP1	0.6556
1734	2765	CPEB3	0.6556
1735	12540	TRIM61	0.6556
1736	2092	CCDC97	0.6556
1737	7714	MTERFD2	0.6556
1738	4022	FAM18B1	0.6556
1739	6953	LRIG2	0.6556
1740	7715	MTERFD3	0.6556
1741	8751	PCNT	0.6556
1742	4026	FAM192A	0.6556
1743	5320	HNRPLL	0.6556
1744	5326	HOOK1	0.6556
1745	10839	SHC1	0.6556
1746	5948	KIAA1324	0.6556
1747	9985	RBM34	0.6556
1748	5719	ITGAD	0.6556
1749	943	ATXN10	0.6556
1750	12033	THRA	0.6556
1751	13853	XLOC_l2_008140	0.6556
1752	3623	EIF1AY	0.6556
1753	2440	CHD3	0.6556
1754	3397	DOCK11	0.6556
1755	9014	PIM1	0.6556
1756	5894	KHDRBS1	0.6556
1757	6610	LOC100505894	0.6556
1758	2609	CLUAP1	0.6556
1759	12204	TMEM186	0.6556
1760	2612	CMC1	0.6556
1761	990	B4GALT4	0.6556
1762	2453	CHI3L2	0.6556
1763	11077	SLC36A1	0.6556
1764	11287	SNPH	0.6556
1765	8840	PECR	0.6556
1766	5887	KDM5C	0.6556
1767	8024	NDUFC1	0.6556
1768	11294	SNRNP48	0.6556
1769	8042	NEDD4	0.6556
1770	6594	LOC100505530	0.6556
1771	11299	SNRPB2	0.6556
1772	5891	KDSR	0.6556
1773	1177	BRIX1	0.6556
1774	8051	NEK4	0.6556
1775	12216	TMEM200B	0.6556
1776	2392	CEP89	0.6556
1777	8005	NDUFA7	0.6556
1778	9056	PKNOX1	0.6556
1779	2394	CEPT1	0.6556
1780	12013	THAP5	0.6556
1781	5901	KIAA0101	0.6556
1782	2390	CEP78	0.6556
1783	2404	CES2	0.6556
1784	5905	KIAA0195	0.6556
1785	3680	ELK3	0.6556
1786	8002	NDUFA4	0.6556
1787	339	AK3	0.6556
1788	390	ALDH9A1	0.6556
1789	164	ACSL6	0.6556
1790	3391	DNMT3A	0.6556
1791	8019	NDUFB5	0.6556
1792	12220	TMEM204	0.6556
1793	8020	NDUFB6	0.6556
1794	11304	SNRPE	0.6556
1795	2614	CMKLR1	0.6556
1796	3390	DNMT1	0.6556
1797	6632	LOC100506518	0.6556
1798	9045	PKD2	0.6556
1799	6628	LOC100506365	0.6556
1800	14426	ZNF480	0.6556
1801	11081	SLC37A3	0.6556
1802	5906	KIAA0196	0.6556
1803	8173	NME4	0.6556
1804	8906	PGM2L1	0.6556
1805	6537	LOC100133124	0.6556
1806	977	B3GALT6	0.6556
1807	12067	TIPRL	0.6556
1808	12065	TINF2	0.6556
1809	3473	DTWD1	0.6556
1810	2516	CINP	0.6556
1811	11190	SMAP1	0.6556
1812	8891	PGAP1	0.6556
1813	8953	PHOSPHO2	0.6556
1814	8105	NFYB	0.6556
1815	8915	PHACTR2	0.6556
1816	3532	E2F3	0.6556
1817	12120	TMED10	0.6556
1818	189	ACTR6	0.6556
1819	11199	SMARCC2	0.6556
1820	8136	NIPSNAP1	0.6556
1821	8930	PHF17	0.6556
1822	5814	KBTBD7	0.6556
1823	13521	XLOC_007680	0.6556
1824	370	AKT3	0.6556
1825	187	ACTR3C	0.6556
1826	371	AKTIP	0.6556
1827	8926	PHF12	0.6556
1828	5801	KAT6A	0.6556
1829	11242	SMURF1	0.6556
1830	8204	NOLC1	0.6556
1831	8101	NFU1	0.6556
1832	13899	XLOC_l2_010724	0.6556
1833	387	ALDH5A1	0.6556
1834	2584	CLK2	0.6556
1835	12168	TMEM14B	0.6556
1836	5872	KDELC2	0.6556
1837	8971	PIBF1	0.6556
1838	12169	TMEM14C	0.6556
1839	3436	DPP8	0.6556
1840	13502	XLOC_007219	0.6556
1841	3584	EFCAB4B	0.6556
1842	3586	EFCAB7	0.6556
1843	12157	TMEM132C	0.6556
1844	8859	PEX11B	0.6556
1845	3561	EDAR	0.6556
1846	11165	SLCO4C1	0.6556
1847	8962	PI3	0.6556
1848	11169	SLFN13	0.6556
1849	11168	SLFN12L	0.6556
1850	3541	EBAG9	0.6556
1851	11243	SMURF2	0.6556
1852	8078	NFATC2	0.6556
1853	11148	SLC7A6	0.6556
1854	3443	DPY30	0.6556
1855	175	ACTL6A	0.6556
1856	12150	TMEM126A	0.6556
1857	6650	LOC100506928	0.6556
1858	11957	TERF2IP	0.6556
1859	3369	DNAJC27	0.6556
1860	3814	ERP27	0.6556
1861	12375	TNRC6A	0.6556
1862	14351	ZNF319	0.6556
1863	5566	IL1RN	0.6556
1864	5564	IL1RAP	0.6556
1865	3800	ERGIC2	0.6556
1866	8260	NR2C1	0.6556
1867	12361	TNKS2	0.6556
1868	3817	ERRFI1	0.6556
1869	898	ATP5L2	0.6556
1870	3819	ERV3-1	0.6556
1871	5938	KIAA1009	0.6556
1872	12387	TOMM20	0.6556
1873	145	ACOX3	0.6556
1874	11360	SOX5	0.6556
1875	14353	ZNF320	0.6556
1876	8251	NPTXR	0.6556
1877	8254	NQO2	0.6556
1878	11978	TFCP2L1	0.6556
1879	7906	NAP1L5	0.6556
1880	327	AIFM1	0.6556
1881	10895	SIT1	0.6556
1882	3795	ERCC6	0.6556
1883	7930	NBPF1	0.6556
1884	9166	PMS1	0.6556
1885	6737	LOC147004	0.6556
1886	13829	XLOC_l2_006983	0.6556
1887	14569	ZNF699	0.6556
1888	12410	TOX	0.6556
1889	14617	ZNF780B	0.6556
1890	9212	POLE3	0.6556
1891	453	ANAPC10	0.6556
1892	10855	SHQ1	0.6556
1893	10861	SIDT1	0.6556
1894	7869	NAA16	0.6556
1895	14563	ZNF69	0.6556
1896	11387	SPAST	0.6556
1897	9218	POLK	0.6556
1898	13596	XLOC_010811	0.6556
1899	11961	TESK1	0.6556
1900	9143	PLSCR1	0.6556
1901	11962	TET1	0.6556
1902	10877	SIKE1	0.6556
1903	2259	CDC73	0.6556
1904	6407	LOC100129280	0.6556
1905	5942	KIAA1147	0.6556
1906	9197	POFUT2	0.6556
1907	446	AMPD3	0.6556
1908	7892	NAF1	0.6556
1909	3844	ETS1	0.6556
1910	14450	ZNF518B	0.6556
1911	9397	PQLC3	0.6556
1912	5949	KIAA1324L	0.6556
1913	3778	EPS15	0.6556
1914	14338	ZNF284	0.6556
1915	10910	SLAIN1	0.6556
1916	8816	PDP2	0.6556
1917	9107	PLEKHA5	0.6556
1918	14603	ZNF765	0.6556
1919	6672	LOC100507445	0.6556
1920	7981	NDC80	0.6556
1921	10991	SLC25A23	0.6556
1922	9106	PLEKHA3	0.6556
1923	5646	INTS7	0.6556
1924	10968	SLC22A5	0.6556
1925	9114	PLEKHG3	0.6556
1926	1000	BAD	0.6556
1927	12285	TMEM87B	0.6556
1928	12304	TMPPE	0.6556
1929	6668	LOC100507347	0.6556
1930	413	ALMS1	0.6556
1931	8819	PDRG1	0.6556
1932	2634	CNO	0.6556
1933	7998	NDUFA12	0.6556
1934	6447	LOC100130429	0.6556
1935	12307	TMPRSS9	0.6556
1936	926	ATP8A2	0.6556
1937	6441	LOC100130314	0.6556
1938	9090	PLCG1	0.6556
1939	5654	IPMK	0.6556
1940	10999	SLC25A32	0.6556
1941	3732	ENOSF1	0.6556
1942	3687	ELMOD2	0.6556
1943	915	ATP6V1C2	0.6556
1944	14447	ZNF514	0.6556
1945	8224	NPAT	0.6556
1946	11996	TGFBI	0.6556
1947	12331	TNFRSF10C	0.6556
1948	5610	INCENP	0.6556
1949	12325	TNFAIP6	0.6556
1950	3335	DNAH11	0.6556
1951	12321	TNF	0.6556
1952	7941	NCAPD2	0.6556
1953	2309	CDKN2AIP	0.6556
1954	3769	EPHX1	0.6556
1955	10939	SLC16A13	0.6556
1956	2306	CDKN1B	0.6556
1957	3750	EP400	0.6556
1958	13452	XLOC_005595	0.6556
1959	3748	EOMES	0.6556
1960	1002	BAG2	0.6556
1961	12313	TMTC4	0.6556
1962	3344	DNAJB1	0.6556
1963	3736	ENPP4	0.6556
1964	3745	ENTPD7	0.6556
1965	7960	NCL	0.6556
1966	12318	TMX3	0.6556
1967	1251	C10orf68	0.6556
1968	10941	SLC16A4	0.6556
1969	10579	SCCPDH	0.6556
1970	3487	DUSP11	0.6556
1971	7147	MANEA	0.6556
1972	14131	ZCCHC11	0.6556
1973	7473	MLANA	0.6556
1974	6101	KRT10	0.6556
1975	4462	FUK	0.6556
1976	7468	MKNK2	0.6556
1977	10260	RNF8	0.6556
1978	10256	RNF44	0.6556
1979	14242	ZNF107	0.6556
1980	13755	XLOC_l2_001064	0.6556
1981	8354	NUFIP2	0.6556
1982	270	AEBP1	0.6556
1983	10274	ROCK1	0.6556
1984	7136	MAN1A1	0.6556
1985	582	APC	0.6556
1986	3115	DCP2	0.6556
1987	1723	C6orf145	0.6556
1988	8664	PAPOLG	0.6556
1989	5036	HAPLN3	0.6556
1990	9753	Q5SRJ3	0.6556
1991	7482	MLL3	0.6556
1992	1726	C6orf163	0.6556
1993	7485	MLLT1	0.6556
1994	7362	METTL16	0.6556
1995	9787	QRSL1	0.6556
1996	9935	RASGRP1	0.6556
1997	242	ADH4	0.6556
1998	7364	METTL18	0.6556
[truncated: 12,709 more rows]

## Sheet: mRMR_Table
mRMR Table
Order	FeatureIndex	FeatureName	MRMRScore
1	11063	SLC35C1	1
2	6673	LOC100507448	0
3	11065	SLC35D1	0
4	11073	SLC35F2	0
5	11049	SLC31A1	0
6	3678	ELFN1	0
7	3676	ELF2	0
8	3685	ELMO1	0
9	3682	ELL	0
10	3476	DTX3L	0
11	955	AUP1	0
12	11158	SLC9A6	0
13	3686	ELMO2	0
14	899	ATP5O	0
15	3825	ESCO1	0
16	3835	ESYT2	0
17	10909	SLA2	0
18	3863	EXOC3L1	0
19	10851	SHOC2	0
20	10845	SHISA5	0
21	3856	EWSR1	0
22	10906	SKP1	0
23	11006	SLC25A39	0
24	917	ATP6V1E1	0
25	925	ATP8A1	0
26	3751	EPB41	0
27	3472	DTNBP1	0
28	11528	SSBP4	0
29	11534	SSNA1	0
30	3193	DEFB1	0
31	3153	DDX19B	0
32	3150	DDX17	0
33	11478	SREBF1	0
34	11490	SRP14	0
35	3049	CYTH4	0
36	11607	STK24	0
37	11461	SPTAN1	0
38	11589	STAT4	0
39	3130	DCXR	0
40	3142	DDOST	0
41	11311	SNURF	0
42	989	B4GALT3	0
43	11302	SNRPD2	0
44	11300	SNRPC	0
45	11435	SPOCK2	0
46	3276	DHX8	0
47	11390	SPATA21	0
48	11358	SOX13	0
49	4439	FRYL	0
50	14126	ZC3HAV1	0
51	749	ARNTL	0
52	14109	ZBTB6	0
53	10370	RPS14	0
54	10427	RRP1	0
55	4369	FMN1	0
56	10323	RPL27	0
57	10356	RPN1	0
58	754	ARPC4	0
59	10367	RPS11	0
60	4386	FNDC9	0
61	14161	ZDHHC4	0
62	14155	ZDHHC20	0
63	10196	RNF113B	0
64	10180	RNASE3	0
65	10156	RIN3	0
66	4612	GDPD5	0
67	3017	CYP11A1	0
68	4009	FAM178B	0
69	4025	FAM190B	0
70	14019	XRCC6	0
71	10701	SEPW1	0
72	3985	FAM160B1	0
73	3939	FAM115C	0
74	10696	SEPHS1	0
75	10828	SH3KBP1	0
76	4249	FER	0
77	10488	RYK	0
78	10510	SACM1L	0
79	4207	FBXO7	0
80	14086	ZBTB2	0
81	10467	RUFY2	0
82	4275	FGFRL1	0
83	799	ASL	0
84	10599	SCNN1D	0
85	4065	FAM40A	0
86	10632	SDHD	0
87	4193	FBXO31	0
88	4712	GMEB1	0
89	2008	CCDC12	0
90	2038	CCDC23	0
91	12596	TSEN54	0
92	12612	TSPAN14	0
93	12601	TSHZ1	0
94	1953	CASP5	0
95	12698	TUBA1B	0
96	1948	CASP10	0
97	1926	CARD10	0
98	1923	CAPZA1	0
99	1313	C12orf57	0
100	2192	CD3E	0
101	2201	CD48	0
102	2169	CD244	0
103	12537	TRIM56	0
104	2124	CCNK	0
105	1863	CACNA2D4	0
106	1607	C22orf46	0
107	13021	VCPIP1	0
108	13000	VAMP5	0
109	1595	C21orf91	0
110	13026	VDR	0
111	12997	VAMP2	0
112	1652	C3orf36	0
113	12961	USP4	0
114	12966	USP47	0
115	12985	UTP18	0
116	13104	VWCE	0
117	13049	VPRBP	0
118	1570	C20orf201	0
119	1471	C19orf66	0
120	12960	USP39	0
121	12798	UBE2F	0
122	1812	C9orf173	0
123	12836	UBP1	0
124	12797	UBE2E4P	0
125	1704	C5orf56	0
126	1427	C17orf85	0
127	1436	C18orf25	0
128	1722	C6orf136	0
129	11899	TCEB1	0
130	2743	COX17	0
131	11857	TBC1D7	0
132	11861	TBCA	0
133	2626	CNGB1	0
134	12034	THRAP3	0
135	2735	CORO7	0
136	2598	CLPS	0
137	2964	CWF19L1	0
138	2943	CTU2	0
139	2974	CXCL5	0
140	11693	SUSD1	0
141	13656	XLOC_012444	0
142	2899	CTAGE15P	0
143	11799	TAP1	0
144	1107	BIN1	0
145	11759	TACO1	0
146	1180	BROX	0
147	13476	XLOC_006443	0
148	2382	CEP350	0
149	12405	TOR1AIP1	0
150	12425	TP73	0
151	2295	CDK5RAP2	0
152	12383	TOE1	0
153	2532	CLASP1	0
154	2578	CLIC5	0
155	1188	BRWD3	0
156	12131	TMEM104	0
157	12102	TM9SF2	0
158	12080	TLE4	0
159	2431	CHCHD3	0
160	2467	CHMP4A	0
161	2507	CIAPIN1	0
162	2482	CHRM4	0
163	674	ARHGAP30	0
164	6173	L2HGDH	0
165	8467	OR2A12	0
166	8609	P4HA2	0
167	14522	ZNF622	0
168	6076	KLRB1	0
169	6133	KRTAP10-3	0
170	8611	P4HB	0
171	8660	PAPD7	0
172	8298	NSMCE1	0
173	6366	LOC100127946	0
174	6442	LOC100130342	0
175	6458	LOC100130542	0
176	8266	NR3C1	0
177	203	ADAM12	0
178	239	ADD1	0
179	8405	OBSCN	0
180	8424	OGDH	0
181	6338	LLPH	0
182	223	ADAR	0
183	8685	PARP3	0
184	8922	PHC3	0
185	8912	PGRMC2	0
186	8877	PFDN5	0
187	8964	PI4K2B	0
188	5795	KANSL2	0
189	5995	KIF2A	0
190	5990	KIF22	0
191	5937	KIAA0947	0
192	5965	KIAA1715	0
193	5946	KIAA1267	0
194	65	ABCD3	0
195	7101	MADD	0
196	7577	MPZL2	0
197	7162	MAP2K7	0
198	7579	MR1	0
199	6961	LRP8	0
200	6932	LPGAT1	0
201	7171	MAP3K4	0
202	7023	LSM14A	0
203	7456	MIS12	0
204	20	9-Sep	0
205	7291	MDH2	0
206	7293	MDM1	0
207	7371	METTL23	0
208	7311	MED15	0
209	7349	MESDC1	0
210	6916	LOC731932	0
211	7200	MAPKAP1	0
212	43	ABCA2	0
213	7206	MAPRE2	0
214	7174	MAP3K7	0
215	30	AAGAB	0
216	6622	LOC100506191	0
217	6615	LOC100506047	0
218	6647	LOC100506906	0
219	8055	NEK9	0
220	8107	NGDN	0
221	8131	NIPA2	0
222	185	ACTR3	0
223	8069	NEUROG1	0
224	14585	ZNF728	0
225	7955	NCK1	0
226	6822	LOC401480	0
227	6854	LOC644285	0
228	6812	LOC400128	0
229	7799	MYBBP1A	0
230	7787	MVP	0
231	7681	MSH6	0
232	7690	MSRA	0
233	6877	LOC648044	0
234	7810	MYEOV2	0
235	7925	NBAS	0
236	7905	NAP1L4	0
237	144	ACOX2	0
238	6750	LOC200726	0
239	7861	N4BP2	0
240	5127	HERC6	0
241	5129	HERPUD2	0
242	5170	HIPK2	0
243	5112	HEG1	0
244	5165	HINT2	0
245	9605	PSME1	0
246	5059	HBS1L	0
247	9593	PSMD11	0
248	5073	HCST	0
249	9716	PVRL1	0
250	5103	HEATR7B1	0
251	561	AP2A1	0
252	9775	Q9EPR2	0
253	9599	PSMD4	0
254	9455	PRKCB	0
255	5263	HLA-F	0
256	5301	HNRNPA1L2	0
257	5307	HNRNPD	0
258	588	APH1A	0
259	9573	PSMB1	0
260	5206	HIST1H3C	0
261	9531	PRR5	0
262	9586	PSMC3	0
263	9589	PSMC5	0
264	9511	PRPF6	0
265	5239	HK1	0
266	14287	ZNF207	0
267	647	ARFGAP2	0
268	9952	RB1CC1	0
269	4832	GPR108	0
270	4828	GPN1	0
271	9965	RBL2	0
272	4784	GOLPH3	0
273	4722	GMPS	0
274	4750	GNGT2	0
275	9927	RASA3	0
276	4956	GSTP1	0
277	4943	GSPT2	0
278	9797	RAB11B	0
279	14234	ZMYND11	0
280	9905	RANGRF	0
281	9849	RAB8A	0
282	9865	RAC1	0
283	5593	ILDR1	0
284	9281	PPA1	0
285	9239	POLR2L	0
286	9150	PLXNA4	0
287	5464	IDS	0
288	14373	ZNF350	0
289	9105	PLEKHA2	0
290	5544	IL10RA	0
291	5539	IKBKG	0
292	445	AMPD2	0
293	444	AMOTL1	0
294	5547	IL12RB1	0
295	455	ANAPC13	0
296	5697	ISG20L2	0
297	9347	PPP1R2	0
298	9334	PPP1R11	0
299	5709	ITCH	0
300	14309	ZNF24	0
301	9360	PPP2R1A	0
302	5391	HSP90AA2	0
303	5377	HSD17B10	0
304	14320	ZNF26	0
305	435	AMH	0
306	5694	ISCU	0
307	9305	PPIB	0
308	9159	PMF1	0
309	9372	PPP2R5D	0
310	1543	C1QL2	0
311	11211	SMCHD1	0.003
312	4494	G3BP1	0.0028
313	11702	SUZ12	0.0026
314	11057	SLC35A4	0.0017
315	11074	SLC35F5	0.0015
316	3662	EIF4EBP2	0.0013
317	3152	DDX19A	0.0013
318	11209	SMC5	0.0011
319	14010	XPO6	0.0011
320	2645	CNPPD1	0.0009
321	5723	ITGAV	0.0007
322	9655	PTMA	0
323	11047	SLC30A7	0.0029
324	3653	EIF3M	0.0027
325	911	ATP6V0E2	0.0025
326	1015	BAIAP3	0.0025
327	11359	SOX4	0.0023
328	3926	FAM107B	0.0023
329	12362	TNNC1	0.0021
330	8073	NF2	0.0019
331	929	ATP8B3	0.0011
332	11194	SMARCA5	0.0009
333	3760	EPC2	0.0007
334	4578	GBP5	0.0007
335	10272	RNU4ATAC	0.0005
336	13079	VPS8	0.0005
337	5738	ITK	0.0003
338	7891	NAE1	0.0001
339	7801	MYBL2	0
340	3497	DUSP28	0.0023
341	3813	ERO1L	0.0021
342	3203	DEK	0.0019
343	710	ARID4B	0.0019
344	10138	RHOU	0.0017
345	12028	THOC5	0.0017
346	14592	ZNF74	0.0015
347	5624	INPP4A	0.0013
348	13884	XLOC_l2_010014	0.0005
349	892	ATP5G3	0.0003
350	7333	MEF2A	0.0002
351	837	ATG12	0.0002
352	7808	MYD88	0
353	4621	GFI1	0.0028
354	1234	C10orf118	0.0028
355	9462	PRKCQ	0.0026
356	11154	SLC9A3R1	0.0016
357	10951	SLC19A2	0.0015
358	13231	XAF1	0.0015
359	14139	ZCCHC4	0.0013
360	5743	ITPK1	0.0013
361	10822	SH3D19	0.0011
362	5582	IL32	0.0011
363	1545	C1QTNF1	0
364	3548	EBPL	0.0027
365	11912	TCF7	0.0027
366	3747	ENY2	0.0026
367	5755	IVNS1ABP	0.0026
368	707	ARID3B	0.0024
369	4264	FGF18	0.0022
370	11056	SLC35A3	0.0017
371	11217	SMEK2	0.0017
372	11708	SVIP	0.0017
373	3551	ECE2	0.0011
374	11581	STARD3NL	0.0009
375	14021	XRN1	0.0008
376	1746	C6orf81	0.0006
377	968	AXIN2	0.0004
378	2328	CEACAM1	0.0004
379	7671	MS4A2	0.0004
380	7213	MARK4	0
381	3468	DTD1	0.0022
382	11593	STAU1	0.002
383	10739	SETBP1	0.0018
384	3251	DHRS13	0.0017
385	9460	PRKCH	0.0017
386	9222	POLR1A	0.0017
387	13696	XLOC_013853	0.0016
388	3803	ERI1	0.0006
389	11572	STAG2	0.0004
390	3919	FAM102A	0.0004
391	4243	FDXACB1	0.0003
392	12414	TP53AIP1	0.0001
393	7216	MARVELD1	0
394	12354	TNIK	0.0025
395	7811	MYH10	0.0023
396	3793	ERCC4	0.0016
397	11468	SPTY2D1	0.0015
398	1303	C12orf4	0.0013
399	8689	PARP9	0.0013
400	6400	LOC100129112	0.0011
401	14199	ZFYVE20	0.0011
402	3820	ERVFRD-1	0.0001
403	8393	OAS1	0.0001
404	7202	MAPKAPK3	0
405	3341	DNAJA2	0.0024
406	13107	WAPAL	0.0023
407	7947	NCBP1	0.0021
408	13387	XLOC_003738	0.0021
409	7488	MLLT3	0.0012
410	3833	ESRRA	0.0011
411	3288	DIP2B	0.001
412	12932	USP1	0.0008
413	9664	PTPLAD2	0.0007
414	11855	TBC1D4	0.0005
415	386	ALDH4A1	0
416	120	ACBD5	0.0022
417	3697	ELP3	0.0021
418	4428	FPR3	0.0019
419	2959	CUX2	0.0018
420	4728	GNAI3	0.0016
421	5927	KIAA0748	0.0013
422	3701	EME1	0.0007
423	10259	RNF7	0.0005
424	2912	CTDSPL2	0.0004
425	9180	PNO1	0.0001
426	7417	MGC42157	0
427	910	ATP6V0E1	0.0018
428	10251	RNF38	0.0016
429	12270	TMEM62	0.0015
430	3744	ENTPD6	0.0005
431	10311	RPL17	0.0004
432	12438	TPMT	0.0002
433	391	ALDOA	0
434	11548	SSX7	0.0016
435	10372	RPS15A	0.0015
436	6197	LANCL1	0.0013
437	11503	SRRM1	0.0004
438	10316	RPL22	0.0002
439	6084	KLRK1	0.0001
440	6819	LOC400968	0
441	11473	SRBD1	0.0015
442	14094	ZBTB33	0.0013
443	2351	CELF3	0.0012
444	364	AKR1E2	0.0022
445	3240	DGKZ	0.0013
446	10710	SERINC1	0.0011
447	8853	PERP	0.001
448	13011	VASP	0.0005
449	6805	LOC389273	0.0012
450	11613	STK38	0.0021
451	10700	SEPSECS	0.0019
452	8815	PDP1	0.0018
453	1074	BCL9L	0.0009
454	3917	FAM100B	0.0008
455	5953	KIAA1430	0.0006
456	4766	GNS	0.0005
457	3714	EMR1	0.0011
458	942	ATXN1	0.0018
459	3672	ELAC1	0.0018
460	3867	EXOC6B	0.0018
461	8540	OSBP	0.0017
462	3638	EIF2C4	0.0017
463	3854	EVL	0.0017
464	11577	STAMBPL1	0.0017
465	7847	MYOF	0.0013
466	12360	TNKS1BP1	0.0019
467	10842	SHFM1	0.0026
468	877	ATP2A2	0.0024
469	10652	SEC24A	0.0034
470	37	AASDH	0.0033
471	10003	RBMX	0.0028
472	11013	SLC25A46	0.0035
473	3219	DERL2	0.0034
474	11303	SNRPD3	0.0034
475	9127	PLEKHO2	0.0029
476	3743	ENTPD5	0.0035
477	3785	ERAP1	0.0043
478	11340	SOCS1	0.0043
479	10803	SGTB	0.0042
480	4702	GLUD1	0.004
481	1611	C2CD4C	0.0043
482	13850	XLOC_l2_008008	0.0051
483	10647	SEC22B	0.005
484	163	ACSL5	0.0048
485	12513	TRIM26	0.0044
486	10993	SLC25A25	0.005
487	14103	ZBTB44	0.005
488	10776	SFT2D2	0.005
489	7862	N4BP2L1	0.0049
490	7582	MRFAP1	0.0055
491	10960	SLC22A14	0.0058
492	11008	SLC25A40	0.0067
493	10163	RIPK1	0.0066
494	12640	TSTD1	0.0066
495	10716	SERPINA1	0.0059
496	11301	SNRPD1	0.0065
497	10544	SASH3	0.0064
498	2249	CDC42BPB	0.0064
499	8132	NIPAL2	0.0072
500	9534	PRRC1	0.0069
501	3731	ENOPH1	0.0073
502	14072	ZAP70	0.0073
503	12775	UBA6	0.0073
504	7982	NDE1	0.0071
505	14024	XXYLT1	0.0073
506	1029	BAZ1A	0.008
507	826	ATF1	0.008
508	1578	C20orf62	0.008
509	7795	MXRA8	0.0078
510	10289	RPA4	0.0082
511	11330	SNX27	0.0088
512	14057	YTHDF2	0.0087
513	7835	MYO1E	0.0085
514	7818	MYL12B	0.0085
515	11488	SRI	0.0086
516	12835	UBOX5	0.0086
517	1701	C5orf44	0.0086
518	7449	MILR1	0.0086
519	5389	HSH2D	0.0091
520	9471	PRKRIR	0.0096
521	12871	UGDH	0.0102
522	11868	TBCK	0.0102
523	11422	SPICE1	0.0102
524	6795	LOC286238	0.0098
525	3356	DNAJC1	0.0101
526	10560	SCAF11	0.0099
527	10235	RNF213	0.0099
528	9673	PTPN22	0.0106
529	1805	C9orf153	0.0104
530	9666	PTPMT1	0.0108
531	2741	COX15	0.0116
532	8979	PIGB	0.0116
533	11357	SOS2	0.0115
534	7322	MED26	0.011
535	11268	SNORA16B	0.0114
536	1366	C15orf61	0.0113
537	9967	RBM12	0.0111
538	8056	NELF	0.0111
539	9582	PSMB8	0.0116
540	11800	TAP2	0.0121
541	6000	KIF5B	0.0121
542	11393	SPATA5L1	0.0121
543	5141	HGD	0.012
544	4770	GOLGA4	0.0122
545	1112	BIRC6	0.0127
546	9670	PTPN13	0.0127
547	10300	RPIA	0.0127
548	11266	SNF8	0.0123
549	1885	CALML5	0.0128
550	11282	SNORA77	0.0134
551	12734	TXK	0.0132
552	9983	RBM3	0.0132
553	14180	ZFP161	0.0139
554	7904	NAP1L1	0.0134
555	13444	XLOC_005449	0.014
556	9942	RASSF3	0.014
557	4486	FYN	0.014
558	3596	EFR3A	0.0134
559	7707	MTCH1	0.0139
560	2297	CDK6	0.0146
561	10389	RPS27L	0.0146
562	5403	HSPA4	0.0143
563	3406	DOK1	0.0147
564	1920	CAPRIN1	0.0146
565	7272	MCM7	0.0145
566	14181	ZFP3	0.0152
567	973	B2M	0.0146
568	3457	DROSHA	0.0153
569	1930	CARD17	0.0151
570	9916	RAPGEF6	0.015
571	2005	CCDC114	0.015
572	613	APOL4	0.0154
573	11438	SPOP	0.0158
574	1335	C14orf166	0.0157
575	6714	LOC100652953	0.0156
576	9886	RALA	0.0163
577	2647	CNPY3	0.0156
578	12422	TP53RK	0.0163
579	10228	RNF187	0.0163
580	1674	C4orf36	0.016
581	3284	DIMT1	0.0165
582	13356	XLOC_002759	0.0164
583	12947	USP25	0.0171
584	5559	IL18R1	0.0169
585	9144	PLSCR3	0.0166
586	1010	BAHD1	0.017
587	1493	C1orf144	0.0168
588	2669	COG3	0.0166
589	10691	SENP2	0.0171
590	12255	TMEM45B	0.0177
591	10443	RSL1D1	0.0176
592	2165	CD209	0.0174
593	884	ATP5A1	0.0177
594	2261	CDCA5	0.0176
595	13059	VPS26A	0.0183
596	11366	SP140L	0.0177
597	8600	P2RY6	0.0184
598	10076	RFFL	0.0183
599	14519	ZNF618	0.0181
600	4996	GUSB	0.0185
601	11661	SUCLG1	0.0192
602	12817	UBE2V2	0.0191
603	7908	NAPB	0.0187
604	4463	FUNDC1	0.0191
605	12837	UBQLN1	0.019
606	11430	SPIRE1	0.0187
607	8181	NMT2	0.0192
608	10062	REST	0.0192
609	11444	SPRED3	0.019
610	5322	HOMER1	0.0194
611	741	ARMC7	0.0198
612	1814	C9orf21	0.0197
613	19	9-Mar	0.0196
614	8158	NLK	0.0199
615	4547	GAPVD1	0.0198
616	12003	TGM7	0.0196
617	6073	KLK6	0.02
618	4484	FYB	0.0205
619	11775	TAF1L	0.0204
620	12915	UQCRC2	0.0211
621	12366	TNNT2	0.0206
622	8984	PIGK	0.0212
623	10184	RNASEH1	0.0212
624	10405	RPS6KL1	0.0206
625	10241	RNF220	0.0212
626	11842	TBC1D15	0.0211
627	11537	SSR2	0.0209
628	2842	CRYBB3	0.0213
629	6048	KLHL15	0.0218
630	10218	RNF166	0.0218
631	3801	ERGIC3	0.0215
632	4414	FOXN2	0.0219
633	11959	TES	0.0218
634	2548	CLDN22	0.0213
635	6026	KLF12	0.0218
636	3946	FAM120A	0.0217
637	11555	ST3GAL5	0.0216
638	4469	FUT11	0.0219
639	10033	RDH13	0.0218
640	2722	COQ10B	0.0224
641	4506	GABPA	0.0217
642	3533	E2F4	0.0216
643	1096	BEX4	0.0223
644	2948	CUL1	0.022
645	328	AIFM2	0.0225
646	861	ATOX1	0.0224
647	14358	ZNF329	0.0221
648	4342	FLJ42351	0.0224
649	1182	BRP44L	0.0223
650	3171	DDX47	0.0219
651	7047	LTN1	0.0224
652	10493	S100A12	0.0224
653	3792	ERCC3	0.0219
654	4368	FLYWCH2	0.0224
655	11784	TAF7	0.0223
656	3440	DPY19L2	0.0217
657	11	5-Mar	0.0223
658	10472	RUNX2	0.0223
659	14118	ZC3H14	0.0217
660	12342	TNFRSF6B	0.0216
661	11788	TAGAP	0.0222
662	7428	MIB1	0.0216
663	10471	RUNX1	0.0216
664	2856	CSF1	0.0214
665	4381	FNBP1	0.0217
666	11762	TADA2A	0.0216
667	132	ACIN1	0.0214
668	4637	GGT1	0.0216
669	11750	SYTL3	0.0215
670	8148	NKIRAS2	0.0212
671	9567	PSMA2	0.0217
672	803	ASNSD1	0.0217
673	1272	C11orf51	0.0211
674	693	ARHGEF19	0.0216
675	1246	C10orf46	0.0215
676	4904	GRASP	0.021
677	4272	FGFR1OP2	0.021
678	6438	LOC100130193	0.0209
679	10089	RG9MTD1	0.0209
680	7252	MBTPS1	0.0209
681	2316	CDR2	0.0215
682	6077	KLRC1	0.0212
683	5469	IER5	0.0209
684	14054	YRDC	0.0209
685	4651	GIMAP4	0.0203
686	2235	CDC14A	0.0202
687	8552	OSCAR	0.02
688	9892	RALGDS	0.0204
689	5541	IKZF2	0.0209
690	12658	TTC27	0.0208
691	4653	GIMAP6	0.0203
692	2256	CDC5L	0.0202
693	8258	NR1H2	0.0198
694	7873	NAA35	0.0202
695	9369	PPP2R5A	0.0208
696	1991	CCAR1	0.0208
697	4671	GK5	0.0203
698	12398	TOP1	0.0202
699	4665	GJA1	0.0196
700	1459	C19orf47	0.0195
701	2533	CLASP2	0.0201
702	1960	CAST	0.0196
703	14168	ZER1	0.0192
704	12103	TM9SF3	0.0191
705	11402	SPDYE1	0.019
706	10104	RGS12	0.0185
707	2519	CIRH1A	0.0183
708	1581	C20orf85	0.0181
709	12587	TSC1	0.0185
710	10445	RSPH3	0.0181
711	12124	TMED5	0.018
712	9966	RBM10	0.0174
713	4510	GABRB3	0.018
714	1228	BZW1	0.0179
715	1881	CALM2	0.0174
716	10152	RIMKLB	0.0171
717	2469	CHMP5	0.017
718	13097	VWA1	0.0167
719	4002	FAM173B	0.017
720	6196	LAMTOR3	0.0169
721	12519	TRIM33	0.0163
722	4423	FPGS	0.016
723	845	ATG4A	0.0166
724	6242	LCOR	0.0165
725	3955	FAM125B	0.016
726	8679	PARP11	0.0158
727	1769	C7orf59	0.0154
728	12994	UXT	0.0159
729	10708	SERGEF	0.0156
730	8271	NRAS	0.0155
731	14025	XYLT1	0.0149
732	357	AKIRIN2	0.0148
733	9503	PRPF31	0.0147
734	10685	SEMA4F	0.0149
735	356	AKIRIN1	0.0148
736	13184	WDTC1	0.0144
737	10314	RPL19	0.0141
738	3894	F2RL2	0.0146
739	8925	PHF11	0.0144
740	3887	EZH2	0.0139
741	8844	PELI2	0.0138
742	12860	UCN3	0.0134
743	12830	UBL5	0.0139
744	3913	FAIM	0.0136
745	5811	KBTBD2	0.0135
746	3882	EXT2	0.0129
747	5740	ITM2B	0.0128
748	4419	FOXP1	0.0128
749	1795	C8orf83	0.0129
750	14007	XPO1	0.0126
751	14435	ZNF498	0.0125
752	9524	PRR18	0.0122
753	3922	FAM104A	0.0125
754	7640	MRPS15	0.0124
755	12930	USMG5	0.0119
756	10509	SAC3D1	0.0117
757	7003	LRRC8C	0.0116
758	7581	MREG	0.0115
759	4260	FGD3	0.0116
760	7328	MED4	0.0115
761	2211	CD7	0.0111
762	10664	SECISBP2	0.0109
763	13213	WNT7A	0.0108
764	7317	MED21	0.0113
765	2808	CREBZF	0.0109
766	10622	SDCCAG8	0.0106
767	7229	MATR3	0.0105
768	9728	PYCR1	0.0102
769	10674	SELPLG	0.0105
770	7212	MARK3	0.0104
771	4839	GPR137	0.0103
772	1154	BPGM	0.0108
773	10615	SDAD1	0.0106
774	7968	NCOA7	0.0105
775	5303	HNRNPA3	0.0103
776	3030	CYP2R1	0.0105
777	6564	LOC100287329	0.0104
778	4880	GPR97	0.0101
779	1081	BDH1	0.0098
780	4609	GDI2	0.0098
781	7963	NCOA2	0.0105
782	13208	WNT1	0.0103
783	2843	CRYBG3	0.0106
784	12661	TTC30B	0.0104
785	7796	MYADM	0.0103
786	1992	CCBL1	0.0097
787	5304	HNRNPAB	0.0097
788	6844	LOC642335	0.0102
789	1851	CABP1	0.0098
790	1160	BPTF	0.0106
791	1950	CASP2	0.0103
792	7927	NBEAL1	0.0102
793	5297	HNF1A	0.0098
794	2039	CCDC25	0.0103
795	7866	NAA10	0.0102
796	1946	CASKIN1	0.0099
797	2053	CCDC53	0.0105
798	7872	NAA30	0.0104
799	2733	CORO2A	0.0101
800	7135	MAMSTR	0.0099
801	1880	CALM1	0.0103
802	9660	PTP4A2	0.0102
803	9859	RABGGTA	0.01
804	2068	CCDC72	0.0105
805	5113	HELB	0.0104
806	1651	C3orf35	0.0102
807	11833	TAX1BP1	0.0109
808	10343	RPL39	0.0106
809	2043	CCDC34	0.0111
810	5042	HAUS2	0.011
811	11999	TGFBR3	0.0107
812	2178	CD300A	0.0104
813	9469	PRKRA	0.0103
814	12758	TYROBP	0.0102
815	2179	CD300C	0.0106
816	9451	PRKAR1B	0.0106
817	9483	PRNP	0.0111
818	11696	SUSD4	0.0107
819	2174	CD276	0.0103
820	1572	C20orf27	0.0103
821	5318	HNRNPUL2	0.0111
822	577	APBA2	0.0107
823	12447	TPRN	0.0111
824	4786	GOLT1B	0.011
825	2774	CPNE9	0.0108
826	11669	SULF2	0.0115
827	1294	C12orf11	0.0111
828	9978	RBM23	0.0111
829	9463	PRKCSH	0.0107
830	12554	TRIP4	0.0111
831	4723	GNA11	0.011
832	10026	RCOR1	0.0118
833	2321	CDS2	0.0114
834	2082	CCDC88C	0.0111
835	10012	RC3H1	0.011
836	10573	SCARA5	0.0108
837	5209	HIST1H3F	0.0111
838	2087	CCDC91	0.0119
839	9819	RAB2A	0.0118
840	12372	TNPO3	0.0113
841	11773	TAF1C	0.0113
842	2079	CCDC86	0.0119
843	14223	ZMIZ1	0.0118
844	10326	RPL29	0.0115
845	12505	TRIM14	0.0118
846	9807	RAB18	0.0117
847	12897	UNCX	0.0115
848	13530	XLOC_008000	0.012
849	2109	CCM2	0.0118
850	9809	RAB1A	0.0118
851	13236	XG	0.0115
852	13168	WDR70	0.0118
853	5002	GYPC	0.0117
854	5211	HIST1H3H	0.0116
855	13031	VEZF1	0.012
856	5658	IPO5	0.0119
857	3896	F7	0.0117
858	2428	CHCHD1	0.0124
859	9680	PTPRC	0.0122
860	13076	VPS53	0.0125
861	9042	PJA2	0.0124
862	10507	S1PR5	0.0123
863	13058	VPS25	0.0119
864	9187	PNPLA8	0.0118
865	12774	UBA52	0.0115
866	13060	VPS26B	0.0118
867	2618	CMTM3	0.0118
868	5659	IPO7	0.0125
869	12182	TMEM167A	0.0122
870	8450	OPN1MW	0.0119
871	1804	C9orf142	0.0126
872	5614	ING3	0.0125
873	12669	TTC38	0.0124
874	12820	UBE3A	0.012
875	9639	PTGDS	0.0119
876	9331	PPP1CB	0.0124
877	2502	CHTF8	0.0119
878	9435	PRIC285	0.0118
879	13227	WWP1	0.0125
880	9371	PPP2R5C	0.0124
881	12759	TYSND1	0.012
882	12804	UBE2J2	0.0124
883	431	AMD1	0.0123
884	4358	FLNA	0.0122
885	1822	C9orf46	0.0126
886	2914	CTLA4	0.0126
887	6208	LARP7	0.0123
888	8721	PCDH1	0.0122
889	1413	C17orf59	0.0127
890	1816	C9orf24	0.0125
891	8146	NKG7	0.0128
892	1817	C9orf25	0.0126
893	8559	OSTC	0.0124
894	1696	C5orf39	0.0119
895	12207	TMEM189	0.0119
896	14084	ZBTB16	0.0124
897	6261	LENG1	0.0129
898	9675	PTPN4	0.0126
899	1425	C17orf81	0.0125
900	7949	NCCRP1	0.0122
901	1716	C6orf120	0.0127
902	5085	HDC	0.0126
903	8333	NUDCD2	0.0123
904	5159	HIGD1A	0.0122
905	1740	C6orf47	0.0125
906	1720	C6orf130	0.012
907	8565	OTUB1	0.0119
908	8332	NUDC	0.0126
909	9766	Q8SQ10	0.0123
910	10415	RQCD1	0.0122
911	2778	CPSF3	0.0125
912	14263	ZNF157	0.0122
913	237	ADCY7	0.0129
914	13600	XLOC_010897	0.0126
915	3726	ENKUR	0.0124
916	13623	XLOC_011421	0.0129
917	10396	RPS6	0.0128
918	8924	PHF10	0.0132
919	11920	TCOF1	0.0127
920	5816	KCNA3	0.0124
921	4296	FKBP11	0.0123
922	1165	BRCC3	0.0126
923	1265	C11orf34	0.0125
924	8938	PHF3	0.0129
925	2984	CXorf26	0.0127
926	12093	TLR8	0.0126
927	2996	CYB561D2	0.013
928	5212	HIST1H3I	0.0129
929	343	AKAP10	0.0132
930	11778	TAF4	0.0128
931	1408	C17orf49	0.0125
932	5797	KARS	0.0129
933	11764	TADA3	0.0126
934	3759	EPC1	0.0126
935	11770	TAF15	0.0129
936	8972	PICALM	0.0127
937	530	ANO7	0.0125
938	1250	C10orf57	0.0128
939	344	AKAP11	0.0125
940	2589	CLN3	0.0123
941	12294	TMEM93	0.0129
942	757	ARPC5L	0.0126
943	5892	KEAP1	0.0129
944	2380	CEP192	0.0127
945	2375	CEP135	0.0123
946	10497	S100A5	0.0121
947	303	AGPAT9	0.0125
948	11632	STS	0.0122
949	12274	TMEM65	0.0128
950	8813	PDLIM5	0.0125
951	12341	TNFRSF4	0.0122
952	7565	MPP6	0.0122
953	6258	LEF1	0.0124
954	2242	CDC26	0.0121
955	3398	DOCK2	0.0119
956	8177	NMI	0.0126
957	2288	CDK2AP2	0.0122
958	70	ABCF3	0.0121
959	7464	MKL1	0.0123
960	2284	CDK19	0.0121
961	7742	MTMR9	0.0119
962	11414	SPG21	0.0116
963	2258	CDC7	0.0123
964	275	AFF2	0.012
965	7123	MAGOH	0.0118
966	7096	MACROD1	0.0118
967	1195	BST2	0.012
968	4512	GABRG2	0.0116
969	12038	THUMPD1	0.0121
970	7659	MRPS35	0.0118
971	7052	LUZP1	0.0116
972	2593	CLNS1A	0.0119
973	2869	CSNK1D	0.0118
974	7642	MRPS17	0.0123
975	3770	EPHX2	0.012
976	12213	TMEM194B	0.0118
977	9574	PSMB10	0.0116
978	6937	LPP	0.012
979	12142	TMEM114	0.0117
980	1705	C5orf58	0.0114
981	90	ABL1	0.0113
982	4398	FOSL2	0.0112
983	1206	BTBD8	0.0116
984	6965	LRRC1	0.0116
985	7264	MCFD2	0.0118
986	1217	BTN3A1	0.0115
987	14317	ZNF257	0.0111
988	7248	MBOAT4	0.0115
989	3433	DPP4	0.0115
990	8546	OSBPL3	0.0112
991	4010	FAM179A	0.011
992	7190	MAPK14	0.0115
993	8547	OSBPL5	0.0112
994	2111	CCNB1IP1	0.0111
995	7444	MIER2	0.0113
996	8538	ORMDL3	0.0111
997	726	ARL4C	0.0109
998	9327	PPM1N	0.0106
999	7225	MAT2B	0.011
1000	10844	SHISA4	0.0108
1001	6201	LAPTM4A	0.0115
1002	8561	OSTF1	0.0111
1003	8017	NDUFB3	0.0109
1004	2098	CCL19	0.0107
1005	8521	OR7E24	0.0109
1006	7989	NDRG1	0.0106
1007	9130	PLIN3	0.0106
1008	8635	PAG1	0.011
1009	4018	FAM188A	0.0107
1010	7967	NCOA6	0.0111
1011	8642	PAK1IP1	0.0109
1012	10283	RORC	0.0106
1013	184	ACTR2	0.0104
1014	13345	XLOC_002275	0.0102
1015	8647	PALLD	0.0106
1016	8477	OR2D3	0.0104
1017	8653	PANK2	0.0108
1018	192	ACVR1	0.0107
1019	5408	HSPB1	0.0103
1020	8688	PARP8	0.0107
1021	7805	MYCBP	0.0104
1022	994	B9D2	0.0102
1023	6393	LOC100128670	0.0108
1024	7743	MTO1	0.0104
1025	1622	C2orf47	0.0104
1026	212	ADAMTS10	0.0106
1027	8303	NSUN3	0.0102
1028	7918	NAT1	0.01
1029	7235	MBD1	0.0099
1030	6299	LILRA1	0.0102
1031	14573	ZNF703	0.0107
1032	5065	HCFC1	0.0105
1033	8372	NUP62CL	0.0102
1034	5418	HTATSF1	0.0101
1035	2170	CD247	0.0102
1036	8413	OCR1	0.0104
1037	9703	PUM1	0.0102
1038	6302	LILRA4	0.01
1039	6268	LEPROT	0.0105
1040	9869	RAD18	0.0102
1041	9428	PREP	0.0106
1042	8404	OBP2B	0.0103
1043	9485	PRO0628	0.01
1044	8364	NUP210	0.0101
1045	6830	LOC440330	0.01
1046	9412	PRDM10	0.0103
1047	909	ATP6V0D1	0.0101
1048	4800	GPA33	0.0106
1049	229	ADC	0.0106
1050	8369	NUP50	0.0102
1051	5310	HNRNPH2	0.01
1052	7411	MGAT5B	0.0099
1053	8367	NUP37	0.01
1054	221	ADAP1	0.0098
1055	9498	PROSER1	0.0104
1056	5831	KCNJ1	0.0101
1057	10760	SF3B1	0.01
1058	14197	ZFYVE16	0.0102
1059	350	AKAP7	0.01
1060	8869	PEX6	0.0096
1061	6845	LOC642620	0.0096
1062	236	ADCY4	0.0098
1063	14179	ZFP106	0.0104
1064	8928	PHF14	0.0101
1065	10029	RCSD1	0.0098
1066	10768	SFMBT2	0.0096
1067	5761	JAK3	0.01
1068	7755	MTRNR2L6	0.0098
1069	8945	PHKA2	0.01
1070	4714	GMFB	0.0098
1071	7763	MTX3	0.0095
1072	14407	ZNF436	0.0099
1073	658	ARHGAP1	0.0096
1074	1122	BLVRA	0.0096
1075	8968	PIAS2	0.01
1076	4961	GTF2A1	0.0096
1077	12541	TRIM62	0.0095
1078	5996	KIF3A	0.0098
1079	8749	PCNA	0.0094
1080	8587	P2RX1	0.0093
1081	614	APOL6	0.0099
1082	1058	BCL11B	0.0096
1083	117	ACAT2	0.0096
1084	9373	PPP2R5E	0.0098
1085	300	AGPAT4	0.0096
1086	6038	KLHDC10	0.0092
1087	9383	PPP6R1	0.0091
1088	9295	PPCS	0.0094
1089	7952	NCF1	0.0092
1090	8709	PBX3	0.0097
1091	6585	LOC100289388	0.0095
1092	9335	PPP1R12A	0.0094
1093	7451	MINK1	0.0092
1094	6020	KIT	0.0095
1095	477	ANKHD1-EIF4EBP3	0.0092
1096	9034	PITPNC1	0.0092
1097	6059	KLHL29	0.0088
1098	12921	URGCP	0.0087
1099	597	APOA2	0.0089
1100	8809	PDK3	0.0094
1101	5903	KIAA0146	0.0091
1102	12922	URM1	0.0088
1103	5964	KIAA1704	0.0091
1104	5704	ISPD	0.0089
1105	5969	KIAA1797	0.0086
1106	6582	LOC100289196	0.0085
1107	7065	LYAR	0.0088
1108	2031	CCDC154	0.0088
1109	7554	MPHOSPH8	0.0088
1110	6847	LOC642947	0.0087
1111	7524	MOB3C	0.0086
1112	10656	SEC31A	0.0086
1113	6527	LOC100132686	0.0087
1114	6936	LPIN2	0.0088
1115	7232	MAX	0.0085
1116	7008	LRRFIP2	0.009
1117	12918	UQCRQ	0.0088
1118	7635	MRPL9	0.0091
1119	3694	ELOVL6	0.0088
1120	6987	LRRC4	0.0085
1121	2014	CCDC126	0.0084
1122	2594	CLOCK	0.0087
1123	7244	MBNL1	0.0087
1124	5735	ITIH3	0.0084
1125	7315	MED19	0.009
1126	12624	TSPO	0.0086
1127	7297	MDP1	0.009
1128	7399	MFSD5	0.0086
1129	10524	SAMD9	0.0085
1130	1511	C1orf21	0.0085
1131	2072	CCDC78	0.0083
1132	7239	MBD5	0.0087
1133	1175	BRI3	0.0084
1134	44	ABCA3	0.0089
1135	38	AASDHPPT	0.0085
1136	7185	MAP7D1	0.0084
1137	7175	MAP3K8	0.0086
1138	2025	CCDC144A	0.0085
1139	7430	MICA	0.0083
1140	5974	KIAA1958	0.0082
1141	4976	GTF3A	0.0086
1142	7211	MARK2	0.009
1143	6009	KIR2DL4	0.0087
1144	5909	KIAA0232	0.0085
1145	4074	FAM48B1	0.0082
1146	13223	WTH3DI	0.0085
1147	8014	NDUFB10	0.0086
1148	8009	NDUFAF1	0.0083
1149	8983	PIGH	0.008
1150	9376	PPP3CC	0.0081
1151	14604	ZNF766	0.0085
1152	6670	LOC100507404	0.0081
1153	14515	ZNF613	0.008
1154	7184	MAP7	0.0079
1155	6694	LOC100652727	0.0083
1156	5840	KCNK5	0.008
1157	8080	NFATC3	0.0083
1158	6576	LOC100288997	0.008
1159	5216	HIST1H4C	0.0078
1160	6323	LINC00085	0.0081
1161	180	ACTN4	0.0081
1162	14639	ZNF816	0.0078
1163	11691	SURF4	0.0076
1164	6752	LOC202025	0.0078
1165	6011	KIR2DS2	0.0076
1166	7940	NCAN	0.0073
1167	2908	CTDP1	0.0071
1168	14620	ZNF783	0.0073
1169	7889	NADKD1	0.007
1170	12173	TMEM151B	0.0068
1171	14394	ZNF414	0.007
1172	673	ARHGAP27	0.0067
1173	14591	ZNF737	0.0064
1174	6378	LOC100128226	0.0067
1175	5139	HEXIM2	0.007
1176	9645	PTGIR	0.0066
1177	4872	GPR65	0.0066
1178	3237	DGKH	0.0065
1179	14265	ZNF160	0.0068
1180	9726	PXN	0.0065
1181	13248	XLOC_000268	0.0063
1182	578	APBB1	0.006
1183	6250	LDHAL6A	0.006
1184	13115	WASL	0.0063
1185	5074	HDAC1	0.0064
1186	7275	MCMBP	0.006
1187	5069	HCLS1	0.0062
1188	3578	EEF2	0.0061
1189	5295	HN1	0.0062
1190	5330	HORMAD1	0.0059
1191	8447	OPA1	0.0057
1192	5265	HLCS	0.0059
1193	14156	ZDHHC21	0.0058
1194	5208	HIST1H3E	0.0057
1195	13671	XLOC_012977	0.0055
1196	5242	HKDC1	0.0057
1197	5230	HIST2H3A	0.0054
1198	14312	ZNF250	0.0052
1199	12177	TMEM160	0.0053
1200	9402	PRAMEF7	0.0056
1201	14192	ZFPL1	0.0052
1202	1077	BCOR	0.005
1203	12158	TMEM134	0.0049
1204	9964	RBL1	0.0052
1205	9999	RBM8A	0.0048
1206	14022	XRN2	0.0046
1207	8975	PIDD	0.0047
1208	4730	GNAO1	0.005
1209	14204	ZFYVE9	0.0047
1210	14154	ZDHHC2	0.0046
1211	11597	STIL	0.0043
1212	9610	PSMG1	0.0047
1213	14228	ZMYM3	0.0043
1214	1755	C7orf29	0.0042
1215	4960	GTDC1	0.0039
1216	6355	LMO7	0.0039
1217	13831	XLOC_l2_007034	0.0041
1218	9824	RAB33A	0.0041
1219	14153	ZDHHC18	0.0039
1220	9818	RAB28	0.0037
1221	6260	LEMD3	0.0037
1222	591	APIP	0.0038
1223	9846	RAB6C	0.0036
1224	14236	ZMYND17	0.0034
1225	3241	DGUOK	0.0033
1226	12653	TTC21B	0.0035
1227	8720	PCCB	0.0036
1228	9838	RAB43	0.0039
1229	12179	TMEM161B	0.0038
1230	9891	RALGAPB	0.0035
1231	6004	KIFC1	0.0032
1232	4868	GPR52	0.0035
1233	7035	LTA	0.0034
1234	9742	Q20ZE8	0.0031
1235	9922	RARRES3	0.0034
1236	3122	DCTN5	0.0033
1237	4937	GSDMD	0.0033
1238	8846	PELO	0.0031
1239	4745	GNG2	0.0033
1240	4928	GRM4	0.0032
1241	7058	LY6G6C	0.0029
1242	14306	ZNF235	0.0032
1243	9021	PION	0.003
1244	3591	EFHD2	0.003
1245	13129	WDPCP	0.0034
1246	5473	IFI16	0.0031
1247	14325	ZNF267	0.0027
1248	11144	SLC6A8	0.0027
1249	7476	MLF2	0.0028
1250	11874	TBL2	0.0031
1251	9259	POP4	0.0032
1252	5591	IL7R	0.0029
1253	8512	OR5A1	0.0027
1254	9104	PLEKHA1	0.0029
1255	9761	Q89B38	0.0027
1256	8428	OGFRL1	0.003
1257	9241	POLR3B	0.0031
1258	5485	IFIT5	0.0027
1259	12012	THAP4	0.0027
1260	9131	PLIN4	0.0028
1261	5035	HAPLN2	0.0025
1262	12415	TP53BP1	0.0028
1263	9213	POLE4	0.0029
1264	8509	OR56A3	0.0026
1265	9110	PLEKHF1	0.0029
1266	9070	PLA2G6	0.0026
1267	7518	MOAP1	0.0023
1268	5510	IGANRP	0.0026
1269	3378	DNAL4	0.0025
1270	5508	IFT80	0.0026
1271	9192	POC1B	0.0023
1272	12200	TMEM184B	0.0021
1273	421	ALPK1	0.0023
1274	5143	HGFAC	0.0021
1275	5693	ISCA2	0.0023
1276	2210	CD69	0.0021
1277	5710	ITFG1	0.0019
1278	5985	KIF19	0.0018
1279	14382	ZNF384	0.0019
1280	7520	MOB1B	0.0017
1281	14352	ZNF32	0.0019
1282	11757	TACC1	0.0017
1283	5707	ISY1-RAB43	0.0019
1284	1056	BCL10	0.0017
1285	9154	PM20D1	0.0016
1286	5987	KIF1C	0.0013
1287	9169	PMVK	0.0016
1288	1157	BPIFA1	0.0014
1289	9035	PITPNM1	0.0016
1290	8470	OR2A7	0.0011
1291	571	AP3S2	0.0012
1292	3605	EGLN2	0.0009
1293	9662	PTPLA	0.0011
1294	8619	PABPC4	0.0008
1295	7509	MMP28	0.0009
1296	5172	HIRA	0.0007
1297	1158	BPIFC	0.0005
1298	8523	OR7G2	0.0006
1299	1895	CAMK2N1	0.0005
1300	18	8-Sep	0.0003
1301	8062	NET1	0.0004
1302	12684	TTLL1	0.0003
1303	8566	OTUB2	0.0001
1304	8591	P2RX6	0.0001
1305	5889	KDM6A	0.0002
1306	6215	LATS1	0.0003
1307	9790	QSOX2	0
1308	7129	MALT1	0.0003
1309	4896	GPX4	0.0002
1310	12123	TMED4	0.0004
1311	7484	MLL5	0.0002
1312	14230	ZMYM5	0.0005
1313	8486	OR2T27	0.0003
1314	3187	DECR2	0.0002
1315	854	ATIC	0.0005
1316	7416	MGC40069	0.0005
1317	7483	MLL4	0.0004
1318	4876	GPR78	0.0003
1319	5957	KIAA1530	0.0004
1320	8901	PGK1	0.0005
1321	4039	FAM201B	0.0007
1322	10211	RNF144A	0.0009
1323	4885	GPRIN1	0.0006
1324	11235	SMPDL3B	0.0007
1325	14459	ZNF543	0.0009
1326	6180	LACTBL1	0.0007
1327	6031	KLF3	0.0008
1328	8579	OXNAD1	0.001
1329	13534	XLOC_008083	0.0011
1330	6738	LOC147646	0.0012
1331	2490	CHST10	0.001
1332	14560	ZNF687	0.0011
1333	9974	RBM18	0.0013
1334	6551	LOC100233156	0.0013
1335	14402	ZNF429	0.0013
1336	10719	SERPINB1	0.0015
1337	147	ACP2	0.0016
1338	8417	ODF2L	0.0015
1339	7490	MLLT6	0.0015
1340	6171	L1CAM	0.0016
1341	8287	NRSN2	0.0015
1342	8967	PIAS1	0.0016
1343	9969	RBM14	0.0017
1344	7477	MLH1	0.0017
1345	4966	GTF2F1	0.0017
1346	13505	XLOC_007290	0.0017
1347	5050	HAVCR2	0.0018
1348	4916	GRIK4	0.0018
1349	8780	PDDC1	0.0018
1350	2570	CLEC4M	0.0019
1351	9884	RAF1	0.0019
1352	13879	XLOC_l2_009639	0.0021
1353	5064	HCCS	0.0016
1354	6248	LDB2	0.0019
1355	13869	XLOC_l2_009285	0.0018
1356	7241	MBIP	0.0015
1357	9769	Q8ZSP1	0.0016
1358	1039	BBS5	0.0017
1359	6078	KLRC3	0.0019
1360	9852	RABAC1	0.0016
1361	9778	QARS	0.0016
1362	4245	FECH	0.0016
1363	14058	YTHDF3	0.0017
1364	8883	PFKP	0.0018
1365	121	ACBD6	0.002
1366	6082	KLRG1	0.0021
1367	7548	MPDU1	0.0017
1368	6534	LOC100132874	0.0018
1369	6213	LAT	0.0019
1370	24	A2M	0.002
1371	14264	ZNF16	0.0017
1372	9256	POMZP3	0.0019
1373	6514	LOC100132174	0.0017
1374	5482	IFIT1	0.0019
1375	53	ABCB7	0.0018
1376	14367	ZNF341	0.0019
1377	14566	ZNF695	0.0017
1378	14378	ZNF367	0.0019
1379	5483	IFIT2	0.002
1380	14516	ZNF614	0.0018
1381	1111	BIRC3	0.0019
1382	7163	MAP3K1	0.0016
1383	162	ACSL4	0.0016
1384	6630	LOC100506447	0.0017
1385	5019	H2AFY	0.0018
1386	6706	LOC100652802	0.0017
1387	2651	CNST	0.0018
1388	5952	KIAA1429	0.0019
1389	7984	NDFIP1	0.0018
1390	8360	NUP155	0.0019
1391	3331	DNAAF2	0.0019
1392	5631	INPP5K	0.002
1393	8564	OTOP2	0.0021
1394	298	AGPAT2	0.0022
1395	5555	IL17RC	0.0021
1396	6970	LRRC18	0.0023
1397	8361	NUP160	0.0024
1398	2426	CHAF1B	0.0024
1399	8031	NDUFS6	0.0025
1400	8718	PCBP4	0.0027
1401	7140	MAN2A1	0.0028
1402	5692	ISCA1	0.0028
1403	7547	MOV10	0.003
1404	5029	HADH	0.0031
1405	9146	PLVAP	0.003
1406	8733	PCDHGA8	0.0032
1407	14668	ZNF93	0.0034
1408	9057	PKP1	0.0034
1409	6815	LOC400682	0.0035
1410	9470	PRKRIP1	0.0036
1411	8336	NUDT10	0.0038
1412	5028	HACL1	0.0037
1413	6449	LOC100130433	0.0038
1414	7310	MED14	0.004
1415	8341	NUDT17	0.004
1416	13578	XLOC_009948	0.0041
1417	11112	SLC45A4	0.0043
1418	6966	LRRC10	0.0041
1419	4918	GRIN2C	0.0043
1420	4056	FAM25A	0.0043
1421	2075	CCDC82	0.0043
1422	8023	NDUFB9	0.0042
1423	8839	PECAM1	0.0042
1424	8750	PCNP	0.0045
1425	5437	HYOU1	0.0047
1426	11520	SRXN1	0.0048
1427	8223	NPAS1	0.0044
1428	7519	MOB1A	0.0046
1429	11641	STX18	0.0048
1430	1610	C2CD3	0.0048
1431	12530	TRIM43	0.0047
1432	11022	SLC26A6	0.0048
1433	4429	FRA10AC1	0.0048
1434	14445	ZNF512B	0.0047
1435	11882	TBX21	0.0049
1436	14254	ZNF138	0.005
1437	9585	PSMC2	0.0049
1438	12649	TTC16	0.0051
1439	5136	HEXB	0.0053
1440	6231	LCK	0.0054
1441	8526	ORAI1	0.0053
1442	12387	TOMM20	0.0055
1443	6407	LOC100129280	0.0056
1444	7985	NDFIP2	0.0055
1445	12232	TMEM222	0.0053
1446	12044	TIAM1	0.0054
1447	14443	ZNF511	0.0056
1448	12445	TPRG1L	0.0057
1449	5096	HEATR1	0.0055
1450	5057	HBP1	0.0056
1451	2550	CLDN3	0.0057
1452	5231	HIST2H3D	0.0058
1453	6658	LOC100507055	0.0059
1454	1685	C5AR1	0.0061
1455	9668	PTPN11	0.0058
1456	13406	XLOC_004470	0.0059
1457	6508	LOC100132005	0.0061
1458	13204	WLS	0.0061
1459	8496	OR4A47	0.0059
1460	14454	ZNF526	0.0061
1461	4371	FMNL2	0.0061
1462	559	AP1S2	0.0062
1463	362	AKR1B1	0.0065
1464	2386	CEP63	0.0065
1465	4128	FAM98B	0.0062
1466	14551	ZNF673	0.0064
1467	6959	LRP3	0.0066
1468	6499	LOC100131662	0.0066
1469	12403	TOPORS	0.0064
1470	6192	LAMP1	0.0062
1471	4663	GIT1	0.0063
1472	8754	PCNXL3	0.0065
1473	6484	LOC100131150	0.0068
1474	6350	LMNB1	0.0066
1475	7083	LYSMD2	0.0064
1476	6485	LOC100131170	0.0066
1477	11373	SP9	0.0066
1478	672	ARHGAP26	0.0067
1479	6369	LOC100127994	0.0064
1480	5312	HNRNPK	0.0067
1481	14428	ZNF484	0.0065
1482	7578	MPZL3	0.0067
1483	9682	PTPRE	0.0064
1484	5848	KCNQ2	0.0067
1485	3400	DOCK4	0.0066
1486	214	ADAMTS2	0.0064
1487	5134	HES6	0.0064
1488	9370	PPP2R5B	0.0067
1489	671	ARHGAP25	0.0068
1490	14256	ZNF141	0.0063
1491	5501	IFT20	0.0065
1492	9686	PTPRJ	0.0063
1493	2931	CTSE	0.0065
1494	8312	NT5DC1	0.0062
1495	3173	DDX5	0.0065
1496	14552	ZNF674	0.0062
1497	3102	DCBLD2	0.0065
1498	5130	HES2	0.0062
1499	11951	TELO2	0.0065
1500	10699	SEPP1	0.0066
1501	9706	PURB	0.0061
1502	2803	CREB3L3	0.0064
1503	11794	TANC2	0.0065
1504	1954	CASP6	0.0064
1505	7115	MAGED1	0.006
1506	11886	TBXAS1	0.0063
1507	2176	CD2AP	0.0064
1508	6353	LMO2	0.006
1509	13607	XLOC_011064	0.0062
1510	1641	C2orf89	0.0064
1511	8779	PDCL3	0.0059
1512	11863	TBCC	0.0062
1513	1546	C1QTNF3	0.0063
1514	6021	KLC1	0.0058
1515	2787	CPXM1	0.0061
1516	2994	CYB561	0.0063
1517	13178	WDR89	0.0058
1518	11177	SLK	0.0057
1519	12269	TMEM60	0.0059
1520	14478	ZNF567	0.0057
1521	292	AGFG2	0.0056
1522	11155	SLC9A3R2	0.0056
1523	568	AP3M1	0.0057
1524	7609	MRPL3	0.0056
1525	3647	EIF3G	0.0055
1526	5116	HELZ	0.0056
1527	3466	DSTN	0.0054
1528	7112	MAGEB1	0.0053
1529	3669	EIF5A	0.0053
1530	11511	SRSF12	0.0056
1531	9719	PWP1	0.0052
1532	4852	GPR171	0.0053
1533	3351	DNAJB5	0.0052
1534	1574	C20orf3	0.0053
1535	9466	PRKD3	0.0052
1536	8301	NSRP1	0.0049
1537	1001	BAG1	0.0051
1538	13769	XLOC_l2_001889	0.0053
1539	3183	DDX60	0.005
1540	8740	PCGF5	0.0047
1541	471	ANK3	0.0049
1542	3278	DIABLO	0.0049
1543	2334	CEACAM7	0.0049
1544	7074	LYPLA1	0.0046
1545	3277	DHX9	0.0048
1546	3259	DHRS9	0.005
1547	10554	SBK1	0.0047
1548	5081	HDAC6	0.0044
1549	430	AMBRA1	0.0047
1550	11237	SMS	0.0046
1551	2408	CETN3	0.0046
1552	548	ANXA7	0.0043
1553	3456	DRGX	0.0045
1554	11354	SORL1	0.0047
1555	12671	TTC39B	0.0044
1556	8737	PCGF1	0.0042
1557	14340	ZNF286B	0.0044
1558	13868	XLOC_l2_009184	0.0043
1559	7151	MAP1B	0.0043
1560	5086	HDDC2	0.0041
1561	13244	XLOC_000083	0.0043
1562	699	ARHGEF40	0.0045
1563	13602	XLOC_010924	0.0042
1564	7499	MMGT1	0.0039
1565	1882	CALM3	0.0041
1566	5098	HEATR3	0.0043
1567	13271	XLOC_000659	0.004
1568	4886	GPRIN3	0.0038
1569	1383	C16orf7	0.0037
1570	14545	ZNF667	0.0038
1571	11482	SRF	0.004
1572	9779	QDPR	0.0037
1573	12626	TSPYL1	0.0035
1574	9609	PSMF1	0.0036
1575	13047	VNN2	0.0038
1576	1350	C15orf2	0.0035
1577	13027	VEGFA	0.0036
1578	2234	CDC123	0.0035
1579	6211	LAS1L	0.0033
1580	12699	TUBA1C	0.0033
1581	6019	KIRREL3	0.0034
1582	6212	LASP1	0.0032
1583	1908	CANT1	0.0032
1584	7257	MCAT	0.0034
1585	11937	TDRD6	0.0033
1586	7270	MCM5	0.0029
1587	13295	XLOC_001208	0.0031
1588	4785	GOLPH3L	0.0033
1589	13131	WDR11	0.0029
1590	12883	ULK1	0.0027
1591	629	AQP3	0.0029
1592	4843	GPR144	0.0028
1593	9638	PTGDR2	0.0027
1594	6205	LARP1B	0.0027
1595	13040	VIPR2	0.0028
1596	7574	MPV17L2	0.0028
1597	1679	C4orf46	0.0025
1598	8608	P4HA1	0.0026
1599	9156	PMAIP1	0.0025
1600	13200	WIPI1	0.0024
1601	7367	METTL21A	0.0024
1602	560	AP1S3	0.0024
1603	1721	C6orf132	0.0023
1604	4889	GPSM1	0.0025
1605	12969	USP5	0.0023
1606	4891	GPSM3	0.0025
1607	1660	C3orf71	0.0023
1608	251	ADNP	0.0024
1609	13472	XLOC_006317	0.0023
1610	9889	RALGAPA1	0.0024
1611	2585	CLK3	0.0023
1612	7253	MBTPS2	0.0024
1613	8783	PDE3B	0.0026
1614	12049	TIGD7	0.0022
1615	6127	KRT8P12	0.0023
1616	10016	RCAN3	0.0023
1617	2600	CLPTM1L	0.002
1618	8632	PAFAH1B2	0.0022
1619	12130	TMEM102	0.002
1620	14207	ZGPAT	0.0022
1621	4226	FCGR3A	0.0021
1622	12522	TRIM36	0.002
1623	6141	KRTAP19-2	0.0021
1624	1115	BLK	0.002
1625	13353	XLOC_002705	0.0021
1626	8618	PABPC3	0.0023
1627	1345	C14orf45	0.0021
1628	7260	MCCC2	0.0023
1629	12564	TRMT5	0.0021
1630	9901	RANBP3	0.0023
1631	12367	TNNT3	0.0021
1632	4897	GPX7	0.0023
1633	12308	TMSB10	0.0021
1634	14511	ZNF607	0.0023
1635	4538	GALNT7	0.0022
1636	13436	XLOC_005176	0.0022
1637	4791	GORASP2	0.0022
1638	10937	SLC16A10	0.0024
1639	13407	XLOC_004526	0.0021
1640	1819	C9orf30	0.0022
1641	4420	FOXP3	0.0025
1642	7337	MEF2D	0.0023
1643	12441	TPP2	0.0023
1644	10714	SERINC5	0.0024
1645	7319	MED23	0.0023
1646	2228	CD97	0.0023
1647	10548	SATB1	0.0023
1648	4790	GORASP1	0.0022
1649	12459	TRABD	0.0022
1650	4148	FAS	0.0024
1651	7332	MED9	0.0023
1652	10028	RCOR3	0.0024
1653	2191	CD3D	0.0027
1654	13400	XLOC_004248	0.0025
1655	7331	MED8	0.0025
1656	1839	C9orf95	0.0026
1657	2248	CDC42	0.0024
1658	991	B4GALT5	0.0024
1659	7312	MED16	0.0025
1660	10916	SLBP	0.0025
1661	8267	NR3C2	0.0026
1662	14194	ZFR	0.0025
1663	11979	TFDP1	0.0025
1664	9743	Q25LE9	0.0027
1665	14120	ZC3H18	0.0026
1666	4787	GON4L	0.0026
1667	13830	XLOC_l2_007025	0.0028
1668	4407	FOXJ1	0.0027
1669	14202	ZFYVE27	0.0027
1670	9864	RABL3	0.0029
1671	345	AKAP12	0.0028
1672	10371	RPS15	0.0026
1673	4823	GPI	0.0026
1674	9135	PLLP	0.0027
1675	2782	CPSF7	0.0026
1676	10379	RPS2	0.0027
1677	5513	IGF1R	0.0028
1678	7360	METTL14	0.0027
1679	10338	RPL36AL	0.0027
1680	9961	RBCK1	0.0027
1681	4399	FOXA1	0.0027
1682	7296	MDN1	0.0027
1683	3657	EIF4B	0.0027
1684	758	ARPP19	0.0029
1685	9957	RBBP6	0.0029
1686	735	ARL8A	0.0029
1687	9947	RAVER1	0.0029
1688	10391	RPS29	0.0028
1689	8	2-Sep	0.0028
1690	14060	YWHAE	0.0028
1691	10683	SEMA4C	0.0029
1692	13742	XLOC_l2_000399	0.0029
1693	7307	MED12	0.003
1694	10572	SCARA3	0.0029
1695	2173	CD274	0.003
1696	638	ARAP2	0.0029
1697	10676	SELS	0.0029
1698	2104	CCL28	0.0029
1699	7437	MICB	0.0029
1700	4283	FHL2	0.0028
1701	6778	LOC284581	0.003
1702	4965	GTF2E2	0.0031
1703	7800	MYBL1	0.0031
1704	10475	RUSC2	0.003
1705	3635	EIF2C1	0.0031
1706	7196	MAPK8	0.0032
1707	7454	MIOS	0.0034
1708	5237	HIVEP2	0.0034
1709	4305	FKBP8	0.0034
1710	7188	MAPK1	0.0034
1711	6285	LGMN	0.0034
1712	10643	SEC14L3	0.0036
1713	4788	GOPC	0.0036
1714	6291	LHPP	0.0036
1715	10644	SEC16A	0.0036
1716	7201	MAPKAPK2	0.0036
1717	8674	PARK7	0.0038
1718	5010	GZMM	0.0039
1719	4173	FBXL19	0.004
1720	9217	POLI	0.0041
1721	14227	ZMYM2	0.0039
1722	6282	LGALS9C	0.004
1723	3846	ETV2	0.0041
1724	39	AATF	0.0041
1725	4935	GSC2	0.0042
1726	10102	RGS10	0.0044
1727	4364	FLT3LG	0.0045
1728	9833	RAB3GAP1	0.0046
1729	5486	IFITM1	0.0046
1730	10144	RIC8A	0.0048
1731	8686	PARP4	0.0048
1732	5472	IFFO2	0.0048
1733	10025	RCN3	0.005
1734	6306	LILRB2	0.005
1735	9001	PIK3CA	0.005
1736	10891	SIRT2	0.0052
1737	6311	LIMD1	0.0052
1738	5695	ISG15	0.0052
1739	3802	ERH	0.0054
1740	7168	MAP3K14	0.0054
1741	10473	RUNX3	0.0055
1742	3899	F8A2	0.0055
1743	9791	QTRTD1	0.0055
1744	7623	MRPL44	0.0056
1745	7425	MGST3	0.0055
1746	9411	PRDM1	0.0056
1747	165	ACSM2A	0.0055
1748	8389	NYNRIN	0.0055
1749	926	ATP8A2	0.0056
1750	3050	CYTIP	0.0055
1751	7442	MIEN1	0.0057
1752	853	ATHL1	0.0057
1753	13660	XLOC_012517	0.0057
1754	9815	RAB24	0.0059
1755	990	B4GALT4	0.0059
1756	3136	DDHD1	0.0059
1757	9545	PRSS36	0.006
1758	2641	CNOT6L	0.0058
1759	9107	PLEKHA5	0.006
1760	9813	RAB22A	0.0061
1761	3627	EIF2AK2	0.006
1762	4981	GTF3C6	0.0061
1763	1620	C2orf43	0.0061
1764	11388	SPATA13	0.0061
1765	6298	LIG3	0.0063
1766	11288	SNRK	0.0061
1767	4560	GATA3	0.0063
1768	8365	NUP214	0.0064
1769	6033	KLF6	0.0066
1770	1984	CBX6	0.0064
1771	7238	MBD4	0.0066
1772	11943	TEAD4	0.0065
1773	1955	CASP7	0.0066
1774	14504	ZNF595	0.0067
1775	5949	KIAA1324L	0.0067
1776	13152	WDR48	0.0066
1777	9863	RABL2B	0.0066
1778	9147	PLXDC1	0.0067
1779	13124	WDFY1	0.0067
1780	14525	ZNF625	0.0067
1781	1533	C1orf9	0.0067
1782	7408	MGAT4A	0.0069
1783	9887	RALB	0.0068
1784	2499	CHST7	0.0068
1785	2777	CPSF1	0.0069
1786	7513	MMS19	0.0069
1787	8448	OPA3	0.0069
1788	12148	TMEM123	0.007
1789	5349	HPGD	0.0069
1790	7246	MBNL3	0.0069
1791	10319	RPL23A	0.0071
1792	280	AFTPH	0.0069
1793	6181	LAG3	0.0071
1794	4191	FBXO3	0.0072
1795	7421	MGMT	0.007
1796	10487	RYBP	0.0071
1797	2207	CD6	0.0073
1798	6272	LETMD1	0.0071
1799	10665	SECISBP2L	0.0072
1800	6280	LGALS8	0.0071
1801	10049	RELA	0.0072
1802	7689	MSR1	0.0072
1803	9844	RAB5C	0.0073
1804	10860	SIAH2	0.0074
1805	7230	MAU2	0.0072
1806	12108	TMC4	0.0074
1807	10116	RHBDD2	0.0075
1808	7410	MGAT5	0.0074
1809	4701	GLTSCR2	0.0075
1810	11719	SYF2	0.0075
1811	9851	RAB9A	0.0075
1812	4725	GNA13	0.0076
1813	14220	ZMAT2	0.0075
1814	4713	GMEB2	0.0076
1815	6703	LOC100652784	0.0075
1816	243	ADH5	0.0074
1817	10809	SH2D2A	0.0075
1818	11319	SNX15	0.0074
1819	8659	PAPD4	0.0076
1820	5495	IFNGR1	0.0073
1821	12437	TPM4	0.0072
1822	8976	PIEZO1	0.0073
1823	5756	IWS1	0.0071
1824	8534	ORM1	0.0071
1825	9232	POLR2F	0.007
1826	7928	NBEAL2	0.0068
1827	3107	DCK	0.0071
1828	173	ACTG1	0.0067
1829	4649	GIMAP1	0.0067
1830	6810	LOC392288	0.0066
1831	3983	FAM160A1	0.0067
1832	14590	ZNF736	0.0066
1833	4598	GCOM1	0.0066
1834	14127	ZC3HAV1L	0.0065
1835	12039	THUMPD2	0.0066
1836	13144	WDR36	0.0067
1837	5673	IQSEC3	0.0063
1838	268	ADSS	0.0066
1839	6882	LOC651536	0.0062
1840	5554	IL17RB	0.0064
1841	13402	XLOC_004286	0.0062
1842	4058	FAM26F	0.0063
1843	460	ANAPC7	0.0061
1844	1861	CACNA2D2	0.0061
1845	7199	MAPK9	0.0059
1846	14331	ZNF277	0.0059
1847	1297	C12orf26	0.006
1848	14627	ZNF791	0.0056
1849	2107	CCL4	0.0058
1850	1775	C7orf73	0.0055
1851	11867	TBCEL	0.0055
1852	14398	ZNF419	0.0054
1853	13610	XLOC_011117	0.0052
1854	14589	ZNF735	0.0051
1855	12297	TMIGD2	0.005
1856	14621	ZNF784	0.0048
1857	6310	LIMA1	0.0048
1858	14334	ZNF280C	0.0046
1859	4899	GRAMD1B	0.0047
1860	341	AK5	0.0046
1861	9209	POLDIP3	0.0045
1862	8058	NELL2	0.0044
1863	5522	IGFN1	0.0042
1864	6591	LOC100499221	0.004
1865	9003	PIK3CD	0.0038
1866	1318	C12orf75	0.0037
1867	14395	ZNF416	0.0037
1868	10118	RHBDF2	0.0035
1869	9228	POLR2B	0.0037
1870	5503	IFT43	0.0035
1871	10004	RBMX2	0.0034
1872	7838	MYO5A	0.0035
1873	9226	POLR1E	0.0032
1874	13341	XLOC_002198	0.0032
1875	5745	ITPR1	0.0032
1876	9780	QKI	0.0032
1877	1138	BNC2	0.0031
1878	114	ACAP2	0.003
1879	9677	PTPN7	0.0029
1880	7957	NCKAP1L	0.003
1881	9311	PPIH	0.003
1882	5108	HECTD1	0.0028
1883	5428	HUS1B	0.003
1884	2528	CKAP4	0.003
1885	5782	JPH3	0.0028
1886	1499	C1orf174	0.0028
1887	2500	CHSY1	0.0029
1888	1806	C9orf156	0.0028
1889	5429	HUWE1	0.003
1890	9580	PSMB6	0.0029
1891	13069	VPS37C	0.0031
1892	14583	ZNF726	0.003
1893	9284	PPAN-P2RY11	0.0029
1894	8309	NT5C2	0.003
1895	13023	VDAC1	0.003
1896	5420	HTR1B	0.0032
1897	13867	XLOC_l2_009182	0.0032
1898	9915	RAPGEF3	0.003
1899	4652	GIMAP5	0.0031
1900	9326	PPM1M	0.003
1901	9598	PSMD3	0.003
1902	4162	FBLN5	0.0033
1903	6129	KRTAP10-1	0.003
1904	12622	TSPAN5	0.003
1905	12891	UNC45A	0.0029
1906	14633	ZNF800	0.003
1907	12619	TSPAN32	0.0031
1908	13266	XLOC_000543	0.003
1909	2137	CCR5	0.0031
1910	7760	MTSS1	0.0028
1911	13167	WDR7	0.0028
1912	9361	PPP2R1B	0.0028
1913	4898	GRAMD1A	0.003
1914	13599	XLOC_010891	0.0029
1915	1907	CAND2	0.0028
1916	2227	CD96	0.0029
1917	4934	GRXCR2	0.0028
1918	8955	PHRF1	0.0029
1919	13527	XLOC_007814	0.003
1920	14135	ZCCHC2	0.0028
1921	6079	KLRC4	0.0028
1922	9857	RABGAP1L	0.0027
1923	8099	NFRKB	0.0028
1924	6403	LOC100129171	0.0029
1925	4699	GLTPD2	0.0028
1926	9315	PPIL4	0.0027
1927	5056	HBM	0.0027
1928	9031	PITHD1	0.0029
1929	5458	IDH2	0.0027
1930	10067	REXO1	0.0027
1931	5302	HNRNPA2B1	0.0027
1932	13953	XLOC_l2_013857	0.0029
1933	9285	PPAP2A	0.0029
1934	14327	ZNF273	0.0027
1935	9720	PWP2	0.0027
1936	3491	DUSP16	0.0029
1937	7784	MUTYH	0.0027
1938	6648	LOC100506915	0.0027
1939	1936	CARM1	0.0025
1940	5339	HOXB9	0.0026
1941	14308	ZNF238	0.0028
1942	14588	ZNF732	0.0027
1943	3558	ECSIT	0.0025
1944	9190	PNRC1	0.0027
1945	9641	PTGER4	0.0028
1946	5445	ICAM2	0.0028
1947	6572	LOC100288368	0.0026
1948	11605	STK17B	0.0028
1949	2597	CLPP	0.0026
1950	3753	EPB41L2	0.0026
1951	9290	PPARD	0.0027
1952	8939	PHF5A	0.0029
1953	13995	XLOC_l2_015532	0.0027
1954	12573	TRPC3	0.0025
1955	3429	DPM1	0.0025
1956	8007	NDUFA9	0.0025
1957	3147	DDX1	0.0026
1958	10959	SLC22A12	0.0024
1959	3283	DIEXF	0.0025
1960	13377	XLOC_003365	0.0024
1961	4654	GIMAP7	0.0025
1962	9808	RAB19	0.0023
1963	12793	UBE2D3	0.0023
1964	3775	EPN2	0.0023
1965	10724	SERPINB9	0.0026
1966	10465	RTP4	0.0022
1967	3134	DDB2	0.0021
1968	7739	MTMR6	0.0023
1969	12476	TRANK1	0.0023
1970	2078	CCDC85C	0.0022
1971	9133	PLK1S1	0.0021
1972	4777	GOLGA6L9	0.0021
1973	13327	XLOC_001932	0.0024
1974	3077	DBI	0.002
1975	2122	CCNJ	0.0023
1976	13405	XLOC_004392	0.0021
1977	1405	C17orf42	0.0021
1978	3432	DPP3	0.0019
1979	12874	UGP2	0.002
1980	9236	POLR2J	0.002
1981	2640	CNOT6	0.002
1982	12183	TMEM167B	0.0018
1983	2898	CTAG1A	0.0019
1984	2937	CTSO	0.0021
1985	1877	CALCR	0.0018
1986	8435	OLFM2	0.0021
1987	11371	SP7	0.0018
1988	6415	LOC100129408	0.002
1989	6380	LOC100128320	0.0018
1990	5770	JKAMP	0.0018
1991	10382	RPS21	0.0016
1992	13382	XLOC_003510	0.0018
1993	14468	ZNF555	0.0016
1994	1523	C1orf52	0.0015
1995	5720	ITGAE	0.0016
1996	10351	RPL8	0.0014
1997	6926	LPAR5	0.0016
1998	7413	MGC12488	0.0015
[truncated: 12,709 more rows]
